# Supplementary material for: Change in eating habits during the Spanish COVID-19 pandemic lockdown: evidence for a sample of university community
Source: PeerJ. 2023 Jan 25;11:e14244. doi: 10.7717/peerj.14244 (PMC9884042; doi:10.7717/peerj.14244)
Supplement: Supplemental Information 1 — The survey used to collect the data: the different sections of the survey, including personal information, social distancing, health status and eating habits. [file peerj-11-14244-s001.xlsx]

## Sheet: Hoja1
ID respondent	Female	Age	Student	Single	23. Comparing the situation before confinement and the current situation, have your eating habits changed? [Yes, they have improved.]	23. Comparing the pre-confinement situation and the current situation, have your eating habits changed? [Yes, they have worsened.]	23. Comparing the pre-confinement situation and the current situation, have your eating habits changed? [No, they have remained the same].	24. Comparing the pre-confinement situation and the current situation, has your weight changed? [Yes, it has gone up.]	24. Comparing the pre-confinement situation and the current situation, has your weight changed? [Yes, it has gone down.]	24. Comparing the pre-confinement situation and the current situation, has your weight changed? [No, it has stayed the same].	26. How often do you consume the following periods per week? Sugary drinks] [Sugary drinks	26. How often do you consume the following periods per week? [Sweets] 26.	26. How often do you consume the following periods per week? [Alcohol] 26.	26. How often do you consume the following items per week? [Fruits and vegetables] 26.	28. Comparing the situation before the COVID19 pandemic and the current situation, has your time spent on study/work changed? [Yes, the number of hours I spend on these tasks has increased].	28. Comparing the situation before the COVID19 pandemic and the current situation, has your time spent studying/working changed? [Yes, the number of hours I spend on these tasks has decreased].	28. Comparing the situation before the COVID19 pandemic and the current situation, has your study/work time changed? [No, it has remained the same].	29. Approximately what is the monthly income range of your household? [Less than €748.7 per month ].	29. Approximately what range of monthly income does your household's monthly income fall into? [From €748.7 to €1,046.9 per month].	29. Approximately what range of monthly income does your household's monthly income fall within? [From € 1,046.9 to € 1,260.9 per month].	29. Approximately what is the monthly income range of your household? [From €1,260.9 to €1,453.6 per month].	29. Approximately what monthly income range does your household's monthly income fall within? [From € 1,453.6 to € 1,642.3 per month].	29. Approximately what is the monthly income range of your household? [From € 1,642.3 to € 1,871.3 per month].	29. Approximately what is the monthly income range of your household? [From €1,871.3 to €2,187.2 per month].	29. Approximately what range of monthly income does your household's monthly income fall within? [From €2,187.2 to €2,674.7 per month].	29. Approximately what range of monthly income does your household's monthly income fall within? [From €2,674.7 to €3,441.9 per month].	29. Approximately what range of monthly income does your household's monthly income fall within? [3.441,9€ or more.]	29. Approximately what range of monthly income does your household's monthly income fall into? [Don't know/no answer].	30. Number of hours per week spent/dedicated to sport [Before confinement] [After confinement] 30.	30. Number of hours per week spent/took part in sport [After confinement] 30.	Changes in sporting habits	Athlete/Sedentary BEFORE	Athlete/Sedentary AFTER	Have your smoking habits changed with the COVID19 pandemic? [Yes, I have started smoking.]	Have your smoking habits changed with the COVID19 pandemic? [Yes, I smoke more.]	Have your smoking habits changed with the COVID19 pandemic? [Yes, I smoke less].	Have your smoking habits changed with the COVID19 pandemic? [No, I smoke the same amount].	32. Have your smoking habits changed with the COVID19 pandemic? [No, I do not smoke].	Have your mobile phone usage habits changed with the COVID19 pandemic? [Yes, I use it more.]	Have your mobile phone usage habits changed with the COVID19 pandemic? [Yes, I use it less time].	Have your mobile phone usage habits changed with the COVID19 pandemic? [No, I use it the same amount of time.]	33. Have your mobile phone usage habits changed with the COVID19 pandemic? [Almost no usage] [Yes, I use it less often]
1	Yes	22	No	Yes	Yes	No	No	No	Yes	No	Once or several times a month	1 or 2 times a week	Once or several times a month	Daily	Yes	No	No	No	No	No	No	No	No	No	No	Yes	No	No	4 to 6 hours per week	Less than 4 hours a week	Yes, it has worsened	Athlete	Athlete	No	No	No	No	Yes	Yes	No	No	No
5	Yes	23	Yes	Yes	No	No	Yes	Yes	No	No	Never	Never	1 or 2 times a week	Daily	No	No	Yes	No	No	No	No	No	No	No	No	No	No	Yes	Less than 4 hours a week	Less than 4 hours a week	No, it has remained	Athlete	Athlete	No	No	No	No	Yes	Yes	No	No	No
8	No	45	No	No	No	No	Yes	No	Yes	No	Once or several times a month	1 or 2 times a week	1 or 2 times a week	3 or 4 times a week	No	No	Yes	No	No	No	No	No	No	No	No	No	Yes	No	Less than 4 hours a week	4 to 6 hours per week	Yes, it has improved	Athlete	Athlete	No	No	No	No	Yes	No	No	Yes	No
9	No	44	No	Yes	No	No	Yes	No	No	Yes	Never	Once or several times a month	3 or 4 times a week	Daily	No	No	Yes	No	No	No	No	No	No	No	Yes	No	No	No	6 to 8 hours per week	4 to 6 hours per week	Yes, it has worsened	Athlete	Athlete	No	No	No	No	Yes	Yes	No	No	No
11	No	35	No	Yes	No	Yes	No	Yes	No	No	3 or 4 times a week	1 or 2 times a week	1 or 2 times a week	3 or 4 times a week	No	No	Yes	No	No	Yes	No	No	No	No	No	No	No	No	4 to 6 hours per week	Less than 4 hours a week	Yes, it has worsened	Athlete	Athlete	No	No	No	No	Yes	Yes	No	No	No
12	Yes	19	Yes	Yes	No	No	Yes	No	No	Yes	Never	Once or several times a month	Once or several times a month	Daily	Yes	No	No	No	No	No	No	No	No	No	No	Yes	No	No	4 to 6 hours per week	Less than 4 hours a week	Yes, it has worsened	Athlete	Athlete	No	No	No	No	Yes	Yes	No	No	No
13	Yes	19	Yes	No	Yes	No	No	No	Yes	No	Once or several times a month	3 or 4 times a week	Once or several times a month	3 or 4 times a week	Yes	No	No	No	No	No	No	No	No	No	No	No	Yes	No	I do not do sport	Less than 4 hours a week	Yes, it has improved	Sedentary	Athlete	No	No	No	No	Yes	No	No	Yes	No
14	Yes	19	Yes	Yes	No	No	Yes	No	No	Yes	Never	Daily	Once or several times a month	Daily	Yes	No	No	No	No	No	No	No	No	No	No	No	No	Yes	Less than 4 hours a week	I do not do sport	Yes, it has worsened	Athlete	Sedentary	No	No	Yes	No	No	No	No	Yes	No
15	No	23	Yes	No	No	Yes	No	Yes	No	No	Once or several times a month	1 or 2 times a week	Once or several times a month	3 or 4 times a week	No	No	Yes	No	No	No	Yes	No	No	No	No	No	No	No	4 to 6 hours per week	Less than 4 hours a week	Yes, it has worsened	Athlete	Athlete	No	No	No	No	Yes	No	No	Yes	No
16	Yes	20	No	Yes	Yes	No	No	No	Yes	No	Once or several times a month	Once or several times a month	Once or several times a month	3 or 4 times a week	No	Yes	No	No	No	Yes	No	No	No	No	No	No	No	No	I do not do sport	Less than 4 hours a week	Yes, it has improved	Sedentary	Athlete	No	No	No	No	Yes	No	No	Yes	No
17	No	45	No	No	No	No	Yes	No	No	Yes	1 or 2 times a week	1 or 2 times a week	1 or 2 times a week	Daily	Yes	No	No	No	No	No	No	No	No	Yes	No	No	No	No	4 to 6 hours per week	4 to 6 hours per week	No, it has remained	Athlete	Athlete	No	No	No	No	Yes	Yes	No	No	No
18	Yes	19	Yes	Yes	No	No	Yes	No	Yes	No	Never	1 or 2 times a week	Once or several times a month	Daily	No	No	Yes	No	Yes	No	No	No	No	No	No	No	No	No	I do not do sport	I do not do sport	No, it has remained	Athlete	Sedentary	No	No	No	Yes	No	No	No	Yes	No
19	No	19	Yes	Yes	No	No	Yes	No	No	Yes	Once or several times a month	5 or 6 times a week	Once or several times a month	1 or 2 times a week	Yes	No	No	No	No	No	No	No	No	No	No	No	No	Yes	4 to 6 hours per week	I do not do sport	Yes, it has worsened	Sedentary	Sedentary	No	No	No	No	Yes	Yes	No	No	No
22	Yes	33	No	Yes	No	No	Yes	No	No	Yes	Once or several times a month	Once or several times a month	Never	Daily	No	No	Yes	No	Yes	No	No	No	No	No	No	No	No	No	I do not do sport	I do not do sport	No, it has remained	Sedentary	Sedentary	No	No	No	No	Yes	No	No	Yes	No
24	Yes	21	Yes	Yes	No	Yes	No	No	Yes	No	Never	Once or several times a month	Never	Daily	No	Yes	No	No	No	No	No	No	No	No	No	No	No	Yes	4 to 6 hours per week	I do not do sport	Yes, it has worsened	Athlete	Sedentary	No	No	No	No	Yes	Yes	No	No	No
25	No	64	No	No	No	No	Yes	No	No	Yes	Once or several times a month	5 or 6 times a week	1 or 2 times a week	1 or 2 times a week	No	No	Yes	No	No	No	No	No	No	No	Yes	No	No	No	4 to 6 hours per week	4 to 6 hours per week	No, it has remained	Athlete	Athlete	No	No	No	No	Yes	No	No	Yes	No
26	Yes	22	Yes	Yes	Yes	No	No	No	No	Yes	Once or several times a month	Once or several times a month	Once or several times a month	Daily	No	Yes	No	No	No	No	No	No	No	No	No	No	No	Yes	4 to 6 hours per week	4 to 6 hours per week	No, it has remained	Athlete	Athlete	No	No	No	No	Yes	Yes	No	No	No
27	Yes	23	Yes	Yes	No	No	Yes	Yes	No	No	1 or 2 times a week	1 or 2 times a week	Once or several times a month	1 or 2 times a week	No	No	Yes	No	No	No	No	No	No	No	No	Yes	No	No	Less than 4 hours a week	I do not do sport	Yes, it has worsened	Athlete	Sedentary	No	No	No	No	Yes	Yes	No	No	No
29	No	18	Yes	Yes	No	No	Yes	No	No	Yes	Once or several times a month	Once or several times a month	Once or several times a month	5 or 6 times a week	Yes	No	No	No	No	No	No	No	No	No	No	No	No	Yes	Less than 4 hours a week	I do not do sport	Yes, it has worsened	Athlete	Sedentary	No	No	No	No	Yes	No	No	Yes	No
30	Yes	18	Yes	No	No	No	Yes	No	Yes	No	Once or several times a month	1 or 2 times a week	Never	3 or 4 times a week	No	Yes	No	No	No	No	No	No	No	No	No	No	No	Yes	I do not do sport	I do not do sport	No, it has remained	Sedentary	Sedentary	No	No	No	No	Yes	Yes	No	No	No
31	Yes	20	Yes	Yes	No	No	Yes	No	Yes	No	Never	3 or 4 times a week	Never	3 or 4 times a week	Yes	No	No	No	No	No	No	No	No	No	No	No	Yes	No	4 to 6 hours per week	Less than 4 hours a week	Yes, it has worsened	Athlete	Athlete	No	No	No	No	Yes	Yes	No	No	No
32	Yes	19	Yes	Yes	No	Yes	No	Yes	No	No	Never	Never	Never	Daily	No	Yes	No	No	No	No	No	No	No	No	No	No	Yes	No	6 to 8 hours per week	6 to 8 hours per week	No, it has remained	Athlete	Athlete	No	No	No	No	Yes	No	No	Yes	No
34	No	37	No	Yes	No	No	Yes	No	Yes	No	Once or several times a month	1 or 2 times a week	Once or several times a month	1 or 2 times a week	Yes	No	No	Yes	No	No	No	No	No	No	No	No	No	No	4 to 6 hours per week	I do not do sport	Yes, it has worsened	Athlete	Sedentary	No	No	No	No	Yes	Yes	No	No	No
38	Yes	21	Yes	Yes	Yes	No	No	No	No	Yes	Once or several times a month	1 or 2 times a week	Once or several times a month	5 or 6 times a week	Yes	No	No	No	No	Yes	No	No	No	No	No	No	No	No	4 to 6 hours per week	4 to 6 hours per week	No, it has remained	Athlete	Athlete	No	No	No	No	Yes	Yes	No	No	No
39	No	20	Yes	Yes	No	No	Yes	No	No	Yes	Never	Once or several times a month	Never	3 or 4 times a week	No	No	Yes	No	No	No	No	No	No	No	No	No	Yes	No	More than 8 hours a week	6 to 8 hours per week	Yes, it has worsened	Athlete	Athlete	No	No	No	No	Yes	Yes	No	No	No
40	Yes	20	Yes	Yes	No	No	Yes	No	No	Yes	Never	1 or 2 times a week	Never	Daily	Yes	No	No	No	No	No	No	No	No	No	No	No	No	Yes	4 to 6 hours per week	Less than 4 hours a week	Yes, it has worsened	Athlete	Athlete	No	No	No	No	Yes	No	No	Yes	No
41	No	40	No	Yes	Yes	No	No	No	Yes	No	Never	Once or several times a month	3 or 4 times a week	Daily	No	No	Yes	No	No	No	No	No	No	No	Yes	No	No	No	Less than 4 hours a week	6 to 8 hours per week	Yes, it has improved	Athlete	Athlete	No	No	No	No	Yes	No	No	No	Yes
42	No	22	Yes	Yes	No	No	Yes	No	Yes	No	Once or several times a month	3 or 4 times a week	Never	Daily	No	No	Yes	No	Yes	No	No	No	No	No	No	No	No	No	6 to 8 hours per week	4 to 6 hours per week	Yes, it has worsened	Athlete	Athlete	No	No	No	No	Yes	Yes	No	No	No
43	Yes	18	Yes	Yes	No	No	Yes	No	No	Yes	Once or several times a month	Once or several times a month	Never	Daily	Yes	No	No	No	No	No	No	No	No	No	No	No	No	Yes	More than 8 hours a week	6 to 8 hours per week	Yes, it has worsened	Athlete	Athlete	No	No	No	No	Yes	Yes	No	No	No
45	Yes	21	Yes	Yes	No	No	Yes	No	No	Yes	Never	5 or 6 times a week	Never	3 or 4 times a week	No	No	Yes	No	No	No	No	No	No	No	No	No	No	Yes	I do not do sport	I do not do sport	No, it has remained	Sedentary	Sedentary	No	No	No	No	Yes	No	No	Yes	No
46	Yes	21	Yes	Yes	No	No	Yes	No	No	Yes	1 or 2 times a week	1 or 2 times a week	Never	Daily	Yes	No	No	No	Yes	No	No	No	No	No	No	No	No	No	I do not do sport	I do not do sport	No, it has remained	Sedentary	Sedentary	No	No	No	No	Yes	Yes	No	No	No
47	Yes	67	No	No	No	No	Yes	No	No	Yes	Never	Daily	3 or 4 times a week	3 or 4 times a week	No	No	Yes	No	No	No	No	No	No	No	No	Yes	No	No	I do not do sport	Less than 4 hours a week	Yes, it has improved	Sedentary	Athlete	No	No	No	No	Yes	No	No	Yes	No
48	No	18	Yes	Yes	No	No	Yes	No	No	Yes	Never	3 or 4 times a week	Once or several times a month	Daily	No	No	Yes	No	No	No	No	No	No	No	No	No	No	Yes	Less than 4 hours a week	Less than 4 hours a week	No, it has remained	Athlete	Athlete	No	No	No	No	Yes	No	No	Yes	No
49	No	23	No	Yes	No	No	Yes	No	No	Yes	Once or several times a month	Once or several times a month	Once or several times a month	Daily	Yes	No	No	No	No	No	No	No	No	No	No	Yes	No	No	Less than 4 hours a week	4 to 6 hours per week	Yes, it has improved	Athlete	Athlete	No	No	No	No	Yes	No	No	Yes	No
50	Yes	21	Yes	Yes	No	Yes	No	No	Yes	No	1 or 2 times a week	1 or 2 times a week	Once or several times a month	5 or 6 times a week	No	Yes	No	No	No	No	No	Yes	No	No	No	No	No	No	4 to 6 hours per week	Less than 4 hours a week	Yes, it has worsened	Athlete	Athlete	No	Yes	No	No	No	No	No	No	Yes
51	Yes	23	Yes	Yes	Yes	No	No	No	Yes	No	Once or several times a month	Once or several times a month	1 or 2 times a week	Daily	No	Yes	No	No	No	No	No	No	No	No	No	Yes	No	No	6 to 8 hours per week	More than 8 hours a week	Yes, it has improved	Athlete	Athlete	No	No	No	No	Yes	Yes	No	No	No
52	No	26	Yes	Yes	No	No	Yes	Yes	No	No	Once or several times a month	5 or 6 times a week	1 or 2 times a week	3 or 4 times a week	No	Yes	No	No	No	No	No	No	No	Yes	No	No	No	No	I do not do sport	6 to 8 hours per week	Yes, it has improved	Sedentary	Athlete	No	No	No	No	Yes	Yes	No	No	No
53	No	46	No	No	No	No	Yes	Yes	No	No	Never	1 or 2 times a week	5 or 6 times a week	Daily	No	No	Yes	No	No	No	No	No	No	No	No	No	No	Yes	I do not do sport	I do not do sport	No, it has remained	Sedentary	Sedentary	No	No	No	No	Yes	Yes	No	No	No
55	Yes	18	Yes	Yes	No	No	Yes	No	No	Yes	Never	3 or 4 times a week	Never	Daily	No	No	Yes	No	No	No	No	No	No	No	No	No	No	Yes	I do not do sport	Less than 4 hours a week	Yes, it has improved	Sedentary	Athlete	No	No	No	No	Yes	No	No	Yes	No
56	Yes	34	No	Yes	Yes	No	No	No	No	Yes	Never	3 or 4 times a week	Never	Daily	No	No	Yes	No	No	No	No	Yes	No	No	No	No	No	No	4 to 6 hours per week	4 to 6 hours per week	No, it has remained	Athlete	Athlete	No	No	No	No	Yes	Yes	No	No	No
57	Yes	42	No	No	No	No	Yes	Yes	No	No	Once or several times a month	Once or several times a month	1 or 2 times a week	5 or 6 times a week	No	No	Yes	No	No	No	No	No	No	No	No	No	Yes	No	I do not do sport	I do not do sport	No, it has remained	Sedentary	Sedentary	No	No	No	No	Yes	No	No	Yes	No
58	No	22	Yes	Yes	No	No	Yes	No	No	Yes	Never	1 or 2 times a week	Never	3 or 4 times a week	No	No	Yes	No	No	No	No	No	No	No	No	Yes	No	No	4 to 6 hours per week	4 to 6 hours per week	No, it has remained	Athlete	Athlete	No	No	No	No	Yes	Yes	No	No	No
61	Yes	22	Yes	Yes	No	No	Yes	No	No	Yes	1 or 2 times a week	3 or 4 times a week	1 or 2 times a week	Daily	No	No	Yes	No	No	No	No	No	No	No	No	No	Yes	No	Less than 4 hours a week	Less than 4 hours a week	No, it has remained	Athlete	Athlete	No	No	No	No	Yes	Yes	No	No	No
62	No	21	Yes	Yes	No	No	Yes	No	No	Yes	1 or 2 times a week	Never	1 or 2 times a week	5 or 6 times a week	No	No	Yes	No	No	No	Yes	No	No	No	No	No	No	No	4 to 6 hours per week	Less than 4 hours a week	Yes, it has worsened	Athlete	Athlete	No	Yes	No	No	No	Yes	No	No	No
63	No	24	Yes	Yes	No	No	Yes	Yes	No	No	Once or several times a month	1 or 2 times a week	Once or several times a month	Daily	No	No	Yes	Yes	No	No	No	No	No	No	No	No	No	No	6 to 8 hours per week	6 to 8 hours per week	No, it has remained	Athlete	Athlete	No	No	No	No	Yes	Yes	No	No	No
64	Yes	47	No	No	No	No	Yes	No	No	Yes	Once or several times a month	Daily	1 or 2 times a week	Daily	No	No	Yes	No	No	No	No	No	No	No	No	No	Yes	No	4 to 6 hours per week	Less than 4 hours a week	Yes, it has worsened	Athlete	Athlete	No	No	No	No	Yes	No	No	Yes	No
65	No	18	Yes	Yes	No	No	Yes	No	Yes	No	Once or several times a month	Once or several times a month	Once or several times a month	3 or 4 times a week	Yes	No	No	No	No	No	No	No	No	No	No	No	No	Yes	I do not do sport	4 to 6 hours per week	Yes, it has improved	Sedentary	Athlete	No	No	No	No	Yes	Yes	No	No	No
66	No	20	Yes	Yes	Yes	No	No	No	No	Yes	Never	Never	3 or 4 times a week	3 or 4 times a week	No	Yes	No	No	No	No	No	No	No	No	No	No	No	Yes	4 to 6 hours per week	More than 8 hours a week	Yes, it has improved	Athlete	Athlete	Yes	No	No	No	No	Yes	No	No	No
67	No	19	Yes	No	Yes	No	No	No	Yes	No	Once or several times a month	Once or several times a month	Once or several times a month	5 or 6 times a week	No	Yes	No	No	No	No	No	No	No	No	No	No	No	Yes	Less than 4 hours a week	I do not do sport	Yes, it has worsened	Athlete	Sedentary	Yes	No	No	No	No	Yes	No	No	No
68	No	19	Yes	Yes	No	No	Yes	Yes	No	No	3 or 4 times a week	Never	1 or 2 times a week	3 or 4 times a week	No	Yes	No	No	No	No	No	No	Yes	No	No	No	No	No	More than 8 hours a week	I do not do sport	Yes, it has worsened	Athlete	Sedentary	No	No	No	No	Yes	Yes	No	No	No
69	No	30	No	Yes	No	No	Yes	No	No	Yes	Once or several times a month	1 or 2 times a week	Once or several times a month	Daily	Yes	No	No	No	No	Yes	No	No	No	No	No	No	No	No	More than 8 hours a week	4 to 6 hours per week	Yes, it has worsened	Athlete	Athlete	No	No	No	No	Yes	No	No	Yes	No
70	Yes	20	Yes	Yes	No	No	Yes	No	No	Yes	Daily	Daily	1 or 2 times a week	1 or 2 times a week	Yes	No	No	No	No	No	No	Yes	No	No	No	No	No	No	I do not do sport	I do not do sport	No, it has remained	Sedentary	Sedentary	No	No	No	No	Yes	No	No	Yes	No
71	No	22	Yes	Yes	No	No	Yes	No	No	Yes	Never	3 or 4 times a week	Never	Daily	No	No	Yes	No	No	No	No	No	No	No	No	No	No	Yes	I do not do sport	I do not do sport	No, it has remained	Sedentary	Sedentary	No	No	No	No	Yes	Yes	No	No	No
72	Yes	41	No	No	Yes	No	No	No	No	Yes	Never	Never	Never	5 or 6 times a week	Yes	No	No	No	No	No	No	No	No	No	No	Yes	No	No	I do not do sport	I do not do sport	No, it has remained	Sedentary	Sedentary	No	No	No	No	Yes	Yes	No	No	No
73	No	19	Yes	Yes	No	No	Yes	No	No	Yes	Never	3 or 4 times a week	Never	3 or 4 times a week	No	No	Yes	No	No	No	No	No	No	No	No	No	No	Yes	Less than 4 hours a week	Less than 4 hours a week	No, it has remained	Athlete	Athlete	No	No	No	No	Yes	No	No	Yes	No
74	No	45	No	No	No	Yes	No	Yes	No	No	Daily	Daily	1 or 2 times a week	3 or 4 times a week	Yes	No	No	No	No	No	No	No	No	No	No	No	Yes	No	More than 8 hours a week	Less than 4 hours a week	Yes, it has worsened	Athlete	Athlete	No	No	No	No	Yes	Yes	No	No	No
75	Yes	19	Yes	Yes	No	No	Yes	No	Yes	No	Once or several times a month	1 or 2 times a week	Never	Once or several times a month	No	No	Yes	No	No	No	No	No	No	No	No	No	No	Yes	I do not do sport	I do not do sport	No, it has remained	Sedentary	Sedentary	No	No	No	No	Yes	Yes	No	No	No
76	Yes	36	No	No	No	No	Yes	No	No	Yes	Never	Once or several times a month	Once or several times a month	Daily	No	No	Yes	No	No	No	No	No	No	No	Yes	No	No	No	4 to 6 hours per week	Less than 4 hours a week	Yes, it has worsened	Athlete	Athlete	No	No	No	No	Yes	Yes	No	No	No
77	Yes	20	Yes	Yes	No	Yes	No	No	No	Yes	Once or several times a month	5 or 6 times a week	Never	Daily	Yes	No	No	No	No	No	No	No	No	No	Yes	No	No	No	Less than 4 hours a week	I do not do sport	Yes, it has worsened	Athlete	Sedentary	No	No	No	No	Yes	Yes	No	No	No
78	No	20	Yes	Yes	No	No	Yes	No	No	Yes	Never	Never	Once or several times a month	1 or 2 times a week	Yes	No	No	No	No	No	No	No	No	No	No	No	No	Yes	6 to 8 hours per week	4 to 6 hours per week	Yes, it has worsened	Athlete	Athlete	No	No	No	No	Yes	Yes	No	No	No
79	Yes	42	No	No	No	No	Yes	No	No	Yes	Never	1 or 2 times a week	1 or 2 times a week	Daily	Yes	No	No	No	No	No	No	No	No	No	No	No	Yes	No	I do not do sport	I do not do sport	No, it has remained	Sedentary	Sedentary	No	No	No	No	Yes	No	No	Yes	No
80	No	45	No	No	No	Yes	No	Yes	No	No	Never	Never	3 or 4 times a week	5 or 6 times a week	Yes	No	No	No	No	No	No	No	No	No	No	No	Yes	No	4 to 6 hours per week	Less than 4 hours a week	Yes, it has worsened	Athlete	Athlete	No	No	No	No	Yes	No	No	Yes	No
81	No	42	No	No	No	No	Yes	No	Yes	No	Never	Never	Daily	Daily	No	No	Yes	No	No	No	No	No	No	No	Yes	No	No	No	I do not do sport	I do not do sport	No, it has remained	Sedentary	Sedentary	No	Yes	No	No	No	No	No	Yes	No
82	Yes	20.	Yes	No	Yes	No	No	Yes	No	No	3 or 4 times a week	1 or 2 times a week	Once or several times a month	1 or 2 times a week	Yes	No	No	No	No	No	No	No	No	No	No	Yes	No	No	6 to 8 hours per week	4 to 6 hours per week	Yes, it has worsened	Athlete	Athlete	No	No	No	No	Yes	No	Yes	No	No
83	Yes	38	No	Yes	No	Yes	No	Yes	No	No	Never	Once or several times a month	3 or 4 times a week	Daily	No	No	Yes	No	No	No	No	No	Yes	No	No	No	No	No	Less than 4 hours a week	Less than 4 hours a week	No, it has remained	Athlete	Athlete	No	No	No	Yes	No	No	No	Yes	No
84	Yes	19	Yes	Yes	No	Yes	No	Yes	No	No	Once or several times a month	Once or several times a month	Once or several times a month	Daily	Yes	No	No	No	Yes	No	No	No	No	No	No	No	No	No	4 to 6 hours per week	Less than 4 hours a week	Yes, it has worsened	Athlete	Athlete	No	No	No	No	Yes	No	No	Yes	No
85	No	20	Yes	Yes	No	Yes	No	Yes	No	No	3 or 4 times a week	3 or 4 times a week	Never	5 or 6 times a week	No	Yes	No	No	No	No	No	No	No	No	Yes	No	No	No	4 to 6 hours per week	Less than 4 hours a week	Yes, it has worsened	Athlete	Athlete	No	No	No	No	Yes	Yes	No	No	No
86	Yes	19	Yes	Yes	No	No	Yes	No	Yes	No	1 or 2 times a week	Once or several times a month	Never	Daily	Yes	No	No	No	No	No	No	No	No	No	No	No	Yes	No	6 to 8 hours per week	6 to 8 hours per week	No, it has remained	Athlete	Athlete	No	No	No	No	Yes	Yes	No	No	No
87	Yes	32	No	Yes	Yes	No	No	No	Yes	No	Once or several times a month	Daily	Once or several times a month	Daily	Yes	No	No	No	No	No	No	No	No	No	No	No	Yes	No	I do not do sport	I do not do sport	No, it has remained	Sedentary	Sedentary	No	No	No	No	Yes	Yes	No	No	No
88	Yes	18	Yes	No	No	No	Yes	No	No	Yes	1 or 2 times a week	3 or 4 times a week	Never	Daily	Yes	No	No	No	Yes	No	No	No	No	No	No	No	No	No	I do not do sport	I do not do sport	No, it has remained	Sedentary	Sedentary	No	No	No	No	Yes	Yes	No	No	No
89	Yes	23	No	Yes	Yes	No	No	No	Yes	No	Once or several times a month	1 or 2 times a week	Once or several times a month	3 or 4 times a week	Yes	No	No	No	No	No	No	No	No	No	Yes	No	No	No	I do not do sport	4 to 6 hours per week	Yes, it has improved	Sedentary	Athlete	No	No	No	No	Yes	No	No	Yes	No
90	No	54	No	No	No	No	Yes	No	No	Yes	Once or several times a month	1 or 2 times a week	Once or several times a month	Daily	No	No	Yes	No	No	No	No	No	No	No	No	No	Yes	No	Less than 4 hours a week	Less than 4 hours a week	No, it has remained	Athlete	Athlete	No	No	No	No	Yes	No	No	Yes	No
91	No	46	No	No	No	No	Yes	No	Yes	No	1 or 2 times a week	1 or 2 times a week	1 or 2 times a week	Daily	Yes	No	No	No	No	No	No	No	No	No	No	Yes	No	No	4 to 6 hours per week	More than 8 hours a week	Yes, it has improved	Athlete	Athlete	No	No	No	No	Yes	Yes	No	No	No
92	No	28	Yes	Yes	No	No	Yes	No	No	Yes	Once or several times a month	Once or several times a month	1 or 2 times a week	Daily	Yes	No	No	No	No	Yes	No	No	No	No	No	No	No	No	4 to 6 hours per week	I do not do sport	Yes, it has worsened	Athlete	Sedentary	No	No	No	No	Yes	No	No	Yes	No
93	No	22	Yes	Yes	No	Yes	No	Yes	No	No	Never	Never	Never	Daily	No	Yes	No	No	No	No	No	No	No	No	No	No	Yes	No	4 to 6 hours per week	4 to 6 hours per week	No, it has remained	Athlete	Athlete	No	No	No	No	Yes	No	No	Yes	No
95	Yes	24	Yes	Yes	No	No	Yes	Yes	No	No	Once or several times a month	1 or 2 times a week	1 or 2 times a week	Daily	Yes	No	No	No	No	No	No	Yes	No	No	No	No	No	No	Less than 4 hours a week	I do not do sport	Yes, it has worsened	Athlete	Sedentary	No	No	No	No	Yes	Yes	No	No	No
96	Yes	21	Yes	Yes	No	No	Yes	Yes	No	No	Never	1 or 2 times a week	Never	1 or 2 times a week	No	No	Yes	No	No	No	No	No	No	No	No	Yes	No	No	Less than 4 hours a week	Less than 4 hours a week	No, it has remained	Athlete	Athlete	No	No	No	No	Yes	Yes	No	No	No
98	No	47	No	No	No	Yes	No	Yes	No	No	1 or 2 times a week	1 or 2 times a week	1 or 2 times a week	3 or 4 times a week	Yes	No	No	No	No	No	No	No	Yes	No	No	No	No	No	4 to 6 hours per week	I do not do sport	Yes, it has worsened	Athlete	Sedentary	No	No	No	No	Yes	Yes	No	No	No
99	No	20	Yes	Yes	No	No	Yes	No	No	Yes	1 or 2 times a week	3 or 4 times a week	Once or several times a month	5 or 6 times a week	Yes	No	No	No	No	No	No	No	No	No	Yes	No	No	No	6 to 8 hours per week	I do not do sport	Yes, it has worsened	Athlete	Sedentary	No	No	No	No	Yes	No	No	Yes	No
100	Yes	18	Yes	Yes	No	No	Yes	No	No	Yes	Never	1 or 2 times a week	Never	Daily	No	No	Yes	No	No	No	No	No	No	No	No	No	No	Yes	4 to 6 hours per week	I do not do sport	Yes, it has worsened	Athlete	Sedentary	No	No	No	No	Yes	No	No	Yes	No
101	No	20	Yes	Yes	No	No	Yes	Yes	No	No	Once or several times a month	Daily	Never	1 or 2 times a week	Yes	No	No	No	No	No	No	No	Yes	No	No	No	No	No	I do not do sport	Less than 4 hours a week	Yes, it has improved	Sedentary	Athlete	No	No	No	No	Yes	Yes	No	No	No
102	Yes	40	No	No	No	No	Yes	Yes	No	No	Never	Daily	Never	Daily	No	No	Yes	No	No	No	No	No	No	No	No	No	Yes	No	Less than 4 hours a week	Less than 4 hours a week	No, it has remained	Athlete	Athlete	No	No	No	No	Yes	Yes	No	No	No
103	No	45	No	No	No	No	Yes	No	No	Yes	3 or 4 times a week	3 or 4 times a week	1 or 2 times a week	1 or 2 times a week	Yes	No	No	No	No	No	No	No	No	No	No	No	Yes	No	I do not do sport	I do not do sport	No, it has remained	Sedentary	Sedentary	No	No	No	Yes	No	No	No	Yes	No
105	Yes	30	No	No	No	No	Yes	No	No	Yes	Once or several times a month	1 or 2 times a week	Once or several times a month	Daily	Yes	No	No	No	No	No	No	No	No	No	No	Yes	No	No	4 to 6 hours per week	4 to 6 hours per week	No, it has remained	Athlete	Athlete	No	No	No	No	Yes	Yes	No	No	No
106	Yes	22	Yes	Yes	No	Yes	No	Yes	No	No	Once or several times a month	Daily	3 or 4 times a week	Daily	No	No	Yes	No	No	Yes	No	No	No	No	No	No	No	No	Less than 4 hours a week	I do not do sport	Yes, it has worsened	Athlete	Sedentary	No	No	No	No	Yes	No	No	Yes	No
107	Yes	23	No	Yes	No	No	Yes	No	Yes	No	Once or several times a month	Once or several times a month	Once or several times a month	Daily	Yes	No	No	No	No	No	No	No	No	No	No	No	Yes	No	6 to 8 hours per week	Less than 4 hours a week	Yes, it has worsened	Athlete	Athlete	No	No	No	No	Yes	Yes	No	No	No
109	Yes	27	No	Yes	Yes	No	No	No	No	Yes	Never	1 or 2 times a week	Never	5 or 6 times a week	Yes	No	No	No	No	No	No	Yes	No	No	No	No	No	No	I do not do sport	I do not do sport	No, it has remained	Sedentary	Sedentary	No	No	No	No	Yes	Yes	No	No	No
110	No	40	No	No	No	No	Yes	No	No	Yes	Never	Once or several times a month	1 or 2 times a week	Daily	Yes	No	No	No	No	No	No	No	No	No	Yes	No	No	No	4 to 6 hours per week	6 to 8 hours per week	Yes, it has improved	Athlete	Athlete	No	No	No	No	Yes	Yes	No	No	No
111	No	60	No	No	No	No	Yes	No	No	Yes	Never	Never	3 or 4 times a week	1 or 2 times a week	No	No	Yes	No	No	No	No	No	No	Yes	No	No	No	No	I do not do sport	I do not do sport	No, it has remained	Sedentary	Sedentary	No	No	No	No	Yes	Yes	No	No	No
112	Yes	22	No	Yes	No	No	Yes	No	No	Yes	Once or several times a month	3 or 4 times a week	Never	1 or 2 times a week	Yes	No	No	No	No	No	No	No	No	No	No	No	No	Yes	I do not do sport	Less than 4 hours a week	Yes, it has improved	Sedentary	Athlete	No	No	No	No	Yes	No	No	Yes	No
114	No	64	Yes	No	No	No	Yes	No	No	Yes	Never	1 or 2 times a week	3 or 4 times a week	3 or 4 times a week	Yes	No	No	No	No	No	No	No	No	No	No	No	Yes	No	More than 8 hours a week	Less than 4 hours a week	Yes, it has worsened	Athlete	Athlete	No	No	No	No	Yes	No	No	Yes	No
115	Yes	20	Yes	No	No	No	Yes	No	No	Yes	Once or several times a month	Daily	Never	3 or 4 times a week	No	No	Yes	No	No	No	Yes	No	No	No	No	No	No	No	4 to 6 hours per week	4 to 6 hours per week	No, it has remained	Athlete	Athlete	No	No	No	No	Yes	No	No	Yes	No
117	Yes	23	No	Yes	No	No	Yes	No	No	Yes	Once or several times a month	3 or 4 times a week	Never	Daily	Yes	No	No	No	Yes	No	No	No	No	No	No	No	No	No	More than 8 hours a week	More than 8 hours a week	No, it has remained	Athlete	Athlete	No	No	No	No	Yes	Yes	No	No	No
118	No	20	Yes	Yes	No	No	Yes	No	Yes	No	Once or several times a month	Once or several times a month	Never	Daily	Yes	No	No	No	No	No	No	No	No	No	No	No	No	Yes	Less than 4 hours a week	I do not do sport	Yes, it has worsened	Athlete	Sedentary	No	No	No	No	Yes	No	No	Yes	No
119	Yes	24	Yes	Yes	No	Yes	No	Yes	No	No	Once or several times a month	1 or 2 times a week	5 or 6 times a week	5 or 6 times a week	No	No	Yes	No	Yes	No	No	No	No	No	No	No	No	No	4 to 6 hours per week	Less than 4 hours a week	Yes, it has worsened	Athlete	Athlete	No	No	No	No	Yes	Yes	No	No	No
121	Yes	65	No	No	No	No	Yes	No	No	Yes	Once or several times a month	Once or several times a month	1 or 2 times a week	Daily	No	No	Yes	No	No	No	No	No	No	No	No	Yes	No	No	I do not do sport	I do not do sport	No, it has remained	Sedentary	Sedentary	No	No	No	No	Yes	Yes	No	No	No
122	Yes	18	Yes	Yes	No	No	Yes	Yes	No	No	Once or several times a month	3 or 4 times a week	Once or several times a month	Daily	No	No	Yes	No	No	No	No	No	No	Yes	No	No	No	No	I do not do sport	I do not do sport	No, it has remained	Sedentary	Sedentary	No	No	No	No	Yes	Yes	No	No	No
123	No	21	Yes	No	No	No	Yes	No	No	Yes	Once or several times a month	Never	Never	3 or 4 times a week	No	No	Yes	No	No	No	No	No	No	Yes	No	No	No	No	4 to 6 hours per week	I do not do sport	Yes, it has worsened	Athlete	Sedentary	No	No	No	No	Yes	Yes	No	No	No
124	No	18	Yes	Yes	No	No	Yes	No	No	Yes	Never	Daily	Never	Daily	Yes	No	No	No	No	No	No	No	No	No	No	Yes	No	No	More than 8 hours a week	Less than 4 hours a week	Yes, it has worsened	Athlete	Athlete	No	No	No	No	Yes	No	No	Yes	No
125	Yes	19	Yes	Yes	No	No	Yes	No	No	Yes	1 or 2 times a week	Once or several times a month	Once or several times a month	5 or 6 times a week	Yes	No	No	No	No	No	No	No	No	No	No	No	No	Yes	I do not do sport	I do not do sport	No, it has remained	Sedentary	Sedentary	No	No	No	No	Yes	Yes	No	No	No
126	Yes	18	Yes	Yes	No	No	Yes	No	Yes	No	1 or 2 times a week	Daily	Once or several times a month	Daily	Yes	No	No	No	No	No	No	No	No	No	No	No	No	Yes	I do not do sport	4 to 6 hours per week	Yes, it has improved	Sedentary	Athlete	No	No	No	No	Yes	Yes	No	No	No
128	Yes	22	No	Yes	No	Yes	No	Yes	No	No	Once or several times a month	Daily	Once or several times a month	5 or 6 times a week	Yes	No	No	No	No	No	No	No	No	No	No	No	No	Yes	I do not do sport	I do not do sport	No, it has remained	Sedentary	Sedentary	No	No	No	No	Yes	No	No	Yes	No
129	No	18	Yes	Yes	Yes	No	No	No	Yes	No	Never	1 or 2 times a week	1 or 2 times a week	Daily	Yes	No	No	No	No	No	No	No	No	No	No	No	No	Yes	6 to 8 hours per week	6 to 8 hours per week	No, it has remained	Athlete	Athlete	No	No	No	No	Yes	Yes	No	No	No
130	No	55	No	No	No	No	Yes	No	Yes	No	Once or several times a month	5 or 6 times a week	Once or several times a month	Daily	Yes	No	No	No	No	No	No	No	No	No	No	No	Yes	No	4 to 6 hours per week	4 to 6 hours per week	No, it has remained	Athlete	Athlete	No	No	No	No	Yes	No	No	Yes	No
131	No	57	No	No	No	No	Yes	No	No	Yes	Never	Daily	Never	Daily	No	No	Yes	No	No	No	No	No	No	No	No	No	Yes	No	4 to 6 hours per week	Less than 4 hours a week	Yes, it has worsened	Athlete	Athlete	No	No	No	No	Yes	No	No	Yes	No
133	No	49	No	Yes	No	No	Yes	No	No	Yes	Never	3 or 4 times a week	1 or 2 times a week	Daily	Yes	No	No	No	No	No	No	No	No	No	No	No	Yes	No	6 to 8 hours per week	6 to 8 hours per week	No, it has remained	Athlete	Athlete	No	No	No	No	Yes	Yes	No	No	No
134	Yes	55	No	No	No	No	Yes	No	Yes	No	Never	1 or 2 times a week	1 or 2 times a week	Daily	No	No	Yes	No	No	No	No	No	No	No	No	No	No	Yes	6 to 8 hours per week	6 to 8 hours per week	No, it has remained	Athlete	Athlete	No	No	No	No	Yes	Yes	No	No	No
135	No	33	No	Yes	Yes	No	No	No	Yes	No	Never	Once or several times a month	1 or 2 times a week	Daily	Yes	No	No	No	No	No	No	Yes	No	No	No	No	No	No	Less than 4 hours a week	Less than 4 hours a week	No, it has remained	Athlete	Athlete	No	No	No	No	Yes	Yes	No	No	No
138	Yes	20	Yes	Yes	No	No	Yes	No	Yes	No	Never	3 or 4 times a week	Never	1 or 2 times a week	Yes	No	No	No	No	No	No	Yes	No	No	No	No	No	No	Less than 4 hours a week	I do not do sport	Yes, it has worsened	Athlete	Sedentary	No	No	No	No	Yes	Yes	No	No	No
139	Yes	25	No	Yes	No	No	Yes	Yes	No	No	Never	3 or 4 times a week	Never	Daily	Yes	No	No	No	No	No	No	No	No	No	No	No	No	Yes	I do not do sport	I do not do sport	No, it has remained	Sedentary	Sedentary	No	No	No	Yes	No	No	No	Yes	No
140	No	19	Yes	Yes	No	No	Yes	No	No	Yes	Never	3 or 4 times a week	Never	Daily	Yes	No	No	Yes	No	No	No	No	No	No	No	No	No	No	4 to 6 hours per week	4 to 6 hours per week	No, it has remained	Athlete	Athlete	No	No	No	No	Yes	Yes	No	No	No
141	Yes	51	No	No	No	No	Yes	No	No	Yes	Once or several times a month	5 or 6 times a week	3 or 4 times a week	Daily	Yes	No	No	No	No	No	No	No	No	No	No	No	Yes	No	4 to 6 hours per week	4 to 6 hours per week	No, it has remained	Athlete	Athlete	Yes	No	No	No	No	Yes	No	No	No
142	Yes	18	Yes	Yes	No	Yes	No	No	No	Yes	Once or several times a month	3 or 4 times a week	Never	Daily	Yes	No	No	No	No	No	No	No	No	No	No	No	No	Yes	4 to 6 hours per week	Less than 4 hours a week	Yes, it has worsened	Athlete	Athlete	No	No	No	No	Yes	Yes	No	No	No
143	No	22	Yes	Yes	No	Yes	No	No	No	Yes	Never	Daily	Never	Once or several times a month	No	Yes	No	No	No	No	No	Yes	No	No	No	No	No	No	6 to 8 hours per week	I do not do sport	Yes, it has worsened	Athlete	Sedentary	No	No	No	No	Yes	No	No	Yes	No
144	Yes	22	Yes	Yes	No	Yes	No	Yes	No	No	Once or several times a month	1 or 2 times a week	Once or several times a month	Daily	Yes	No	No	No	Yes	No	No	No	No	No	No	No	No	No	I do not do sport	6 to 8 hours per week	Yes, it has improved	Sedentary	Athlete	No	No	No	No	Yes	Yes	No	No	No
145	Yes	61	No	No	No	No	Yes	No	No	Yes	Once or several times a month	3 or 4 times a week	1 or 2 times a week	Daily	Yes	No	No	No	No	No	No	No	No	No	No	No	Yes	No	I do not do sport	Less than 4 hours a week	Yes, it has improved	Sedentary	Athlete	No	No	No	No	Yes	No	No	Yes	No
147	Yes	56	No	No	No	No	Yes	No	Yes	No	Once or several times a month	Daily	5 or 6 times a week	Daily	No	No	Yes	No	No	No	No	No	No	No	No	Yes	No	No	4 to 6 hours per week	Less than 4 hours a week	Yes, it has worsened	Athlete	Athlete	No	No	No	No	Yes	Yes	No	No	No
149	Yes	19	Yes	Yes	No	No	Yes	Yes	No	No	Once or several times a month	1 or 2 times a week	Once or several times a month	Daily	Yes	No	No	No	No	No	No	No	No	No	Yes	No	No	No	Less than 4 hours a week	Less than 4 hours a week	No, it has remained	Athlete	Athlete	No	No	No	No	Yes	Yes	No	No	No
150	Yes	48	No	No	No	No	Yes	No	Yes	No	Once or several times a month	1 or 2 times a week	Once or several times a month	Daily	Yes	No	No	No	No	No	No	No	No	No	No	Yes	No	No	Less than 4 hours a week	Less than 4 hours a week	No, it has remained	Athlete	Athlete	No	Yes	No	No	No	Yes	No	No	No
151	No	40	No	Yes	Yes	No	No	No	Yes	No	Once or several times a month	Once or several times a month	Once or several times a month	Daily	No	No	Yes	No	No	No	No	No	No	No	Yes	No	No	No	Less than 4 hours a week	Less than 4 hours a week	No, it has remained	Athlete	Athlete	No	No	Yes	No	No	No	No	Yes	No
152	No	22	Yes	Yes	Yes	No	No	No	No	Yes	Once or several times a month	Daily	Never	Daily	Yes	No	No	No	No	No	No	No	No	Yes	No	No	No	No	6 to 8 hours per week	6 to 8 hours per week	No, it has remained	Athlete	Athlete	No	No	No	No	Yes	No	No	Yes	No
153	No	55	No	Yes	No	Yes	No	No	No	Yes	Daily	Once or several times a month	3 or 4 times a week	Once or several times a month	Yes	No	No	No	No	Yes	No	No	No	No	No	No	No	No	More than 8 hours a week	More than 8 hours a week	No, it has remained	Athlete	Athlete	Yes	No	No	No	No	Yes	No	No	No
154	No	70	No	No	No	No	Yes	No	No	Yes	Once or several times a month	Daily	1 or 2 times a week	Daily	Yes	No	No	No	No	No	No	No	No	No	No	No	Yes	No	More than 8 hours a week	More than 8 hours a week	No, it has remained	Athlete	Athlete	No	No	No	No	Yes	No	No	Yes	No
155	No	20	Yes	Yes	No	No	Yes	No	No	Yes	Once or several times a month	1 or 2 times a week	Once or several times a month	Once or several times a month	No	No	Yes	No	No	Yes	No	No	No	No	No	No	No	No	I do not do sport	I do not do sport	No, it has remained	Sedentary	Sedentary	No	No	No	Yes	No	No	No	Yes	No
156	Yes	18	Yes	Yes	No	No	Yes	No	No	Yes	Once or several times a month	Once or several times a month	1 or 2 times a week	3 or 4 times a week	No	No	Yes	No	No	No	No	No	Yes	No	No	No	No	No	Less than 4 hours a week	4 to 6 hours per week	Yes, it has improved	Athlete	Athlete	No	No	No	No	Yes	Yes	No	No	No
157	Yes	19	Yes	Yes	No	Yes	No	Yes	No	No	Once or several times a month	1 or 2 times a week	Once or several times a month	5 or 6 times a week	No	No	Yes	No	No	No	No	No	No	No	No	No	Yes	No	Less than 4 hours a week	I do not do sport	Yes, it has worsened	Athlete	Sedentary	No	No	No	No	Yes	Yes	No	No	No
158	Yes	50	No	No	No	No	Yes	No	No	Yes	Never	Once or several times a month	Once or several times a month	Daily	No	No	Yes	No	No	No	No	No	No	No	No	Yes	No	No	4 to 6 hours per week	4 to 6 hours per week	No, it has remained	Athlete	Athlete	No	No	No	No	Yes	Yes	No	No	No
159	Yes	20	Yes	Yes	No	Yes	No	Yes	No	No	Once or several times a month	3 or 4 times a week	Once or several times a month	Daily	Yes	No	No	No	No	No	No	No	No	No	No	No	No	Yes	Less than 4 hours a week	6 to 8 hours per week	Yes, it has improved	Athlete	Athlete	No	No	No	No	Yes	Yes	No	No	No
160	Yes	53	No	No	No	No	Yes	No	No	Yes	Once or several times a month	1 or 2 times a week	Never	Daily	Yes	No	No	No	No	No	No	No	No	No	Yes	No	No	No	6 to 8 hours per week	Less than 4 hours a week	Yes, it has worsened	Athlete	Athlete	No	No	No	No	Yes	Yes	No	No	No
161	Yes	19 años	Yes	Yes	No	No	Yes	No	No	Yes	1 or 2 times a week	3 or 4 times a week	Never	3 or 4 times a week	Yes	No	No	No	Yes	No	No	No	No	No	No	No	No	No	I do not do sport	I do not do sport	No, it has remained	Sedentary	Sedentary	No	No	No	No	Yes	Yes	No	No	No
162	Yes	23	No	Yes	No	No	Yes	No	No	Yes	Never	1 or 2 times a week	Once or several times a month	Daily	Yes	No	No	No	No	No	No	Yes	No	No	No	No	No	No	More than 8 hours a week	6 to 8 hours per week	Yes, it has worsened	Athlete	Athlete	No	No	No	No	Yes	Yes	No	No	No
163	No	35	Yes	Yes	No	No	Yes	Yes	No	No	Once or several times a month	Once or several times a month	Once or several times a month	Daily	No	Yes	No	No	No	No	Yes	No	No	No	No	No	No	No	More than 8 hours a week	More than 8 hours a week	No, it has remained	Athlete	Athlete	No	No	No	Yes	No	No	No	Yes	No
165	Yes	55	No	No	No	No	Yes	No	No	Yes	Never	Once or several times a month	1 or 2 times a week	Daily	Yes	No	No	No	No	No	No	No	No	No	No	No	Yes	No	4 to 6 hours per week	4 to 6 hours per week	No, it has remained	Athlete	Athlete	No	No	No	Yes	No	No	No	Yes	No
166	No	60	No	No	No	No	Yes	No	No	Yes	Never	Never	1 or 2 times a week	Daily	No	No	Yes	No	No	No	No	No	No	No	No	Yes	No	No	Less than 4 hours a week	Less than 4 hours a week	No, it has remained	Athlete	Athlete	No	No	No	Yes	No	No	No	Yes	No
167	Yes	35	No	No	Yes	No	No	No	No	Yes	Never	1 or 2 times a week	1 or 2 times a week	Daily	No	No	Yes	No	No	No	No	No	No	No	No	Yes	No	No	4 to 6 hours per week	4 to 6 hours per week	No, it has remained	Athlete	Athlete	No	No	No	No	Yes	No	No	Yes	No
168	Yes	18	Yes	Yes	No	No	Yes	No	No	Yes	Never	1 or 2 times a week	Never	Daily	No	Yes	No	No	No	No	No	No	No	No	No	Yes	No	No	4 to 6 hours per week	6 to 8 hours per week	Yes, it has improved	Athlete	Athlete	No	No	No	No	Yes	Yes	No	No	No
169	Yes	20	Yes	Yes	No	No	Yes	No	No	Yes	Never	5 or 6 times a week	Never	Once or several times a month	Yes	No	No	Yes	No	No	No	No	No	No	No	No	No	No	I do not do sport	I do not do sport	No, it has remained	Sedentary	Sedentary	No	No	No	No	Yes	No	No	Yes	No
171	Yes	18 años.	Yes	Yes	No	No	Yes	Yes	No	No	Never	Once or several times a month	Once or several times a month	1 or 2 times a week	No	No	Yes	No	No	No	No	No	No	No	No	No	No	Yes	I do not do sport	I do not do sport	No, it has remained	Sedentary	Sedentary	No	No	No	No	Yes	Yes	No	No	No
172	No	23	No	Yes	No	No	Yes	No	No	Yes	Once or several times a month	Never	1 or 2 times a week	Daily	Yes	No	No	No	No	No	No	No	No	No	No	No	Yes	No	4 to 6 hours per week	6 to 8 hours per week	Yes, it has improved	Athlete	Athlete	No	No	No	No	Yes	No	No	No	Yes
174	Yes	61	No	No	No	No	Yes	No	No	Yes	Never	Once or several times a month	Never	Daily	No	No	Yes	No	No	No	No	No	No	No	No	Yes	No	No	Less than 4 hours a week	6 to 8 hours per week	Yes, it has improved	Athlete	Athlete	No	No	No	No	Yes	Yes	No	No	No
176	Yes	18	Yes	Yes	No	Yes	No	No	No	Yes	Once or several times a month	Daily	Once or several times a month	1 or 2 times a week	No	Yes	No	No	No	No	No	No	No	No	No	No	No	Yes	4 to 6 hours per week	I do not do sport	Yes, it has worsened	Athlete	Sedentary	No	Yes	No	No	No	Yes	No	No	No
177	Yes	21	Yes	Yes	No	Yes	No	Yes	No	No	1 or 2 times a week	Once or several times a month	Never	Daily	Yes	No	No	No	Yes	No	No	No	No	No	No	No	No	No	6 to 8 hours per week	Less than 4 hours a week	Yes, it has worsened	Athlete	Athlete	No	No	No	No	Yes	Yes	No	No	No
178	Yes	27	No	Yes	No	No	Yes	No	Yes	No	Never	Once or several times a month	Never	Daily	Yes	No	No	No	No	No	No	No	No	No	Yes	No	No	No	Less than 4 hours a week	4 to 6 hours per week	Yes, it has improved	Athlete	Athlete	No	No	No	No	Yes	Yes	No	No	No
179	Yes	22	Yes	Yes	No	No	Yes	No	No	Yes	Never	Daily	1 or 2 times a week	Daily	No	Yes	No	No	No	No	No	No	No	No	Yes	No	No	No	I do not do sport	I do not do sport	No, it has remained	Sedentary	Sedentary	No	No	No	No	Yes	No	No	Yes	No
180	No	18	Yes	Yes	No	Yes	No	No	No	Yes	Never	Once or several times a month	Never	3 or 4 times a week	No	Yes	No	No	No	Yes	No	No	No	No	No	No	No	No	6 to 8 hours per week	I do not do sport	Yes, it has worsened	Athlete	Sedentary	No	No	No	No	Yes	Yes	No	No	No
181	Yes	56	No	No	Yes	No	No	No	Yes	No	Never	3 or 4 times a week	3 or 4 times a week	Daily	Yes	No	No	No	No	No	No	No	No	No	No	No	No	Yes	4 to 6 hours per week	6 to 8 hours per week	Yes, it has improved	Athlete	Athlete	No	No	No	No	Yes	No	No	Yes	No
182	Yes	56	No	No	No	No	Yes	No	Yes	No	Never	Once or several times a month	Never	Daily	Yes	No	No	No	No	No	No	No	No	No	No	Yes	No	No	Less than 4 hours a week	Less than 4 hours a week	No, it has remained	Athlete	Athlete	No	No	No	No	Yes	Yes	No	No	No
183	Yes	23	No	Yes	No	No	Yes	No	No	Yes	Once or several times a month	1 or 2 times a week	Never	3 or 4 times a week	No	Yes	No	No	No	No	No	No	No	No	No	No	Yes	No	I do not do sport	Less than 4 hours a week	Yes, it has improved	Sedentary	Athlete	No	No	No	No	Yes	Yes	No	No	No
184	Yes	21	Yes	Yes	Yes	No	No	No	Yes	No	Once or several times a month	Once or several times a month	Never	Daily	Yes	No	No	No	No	No	No	No	No	No	No	No	No	Yes	6 to 8 hours per week	4 to 6 hours per week	Yes, it has worsened	Athlete	Athlete	No	No	No	No	Yes	Yes	No	No	No
185	No	37	No	No	No	No	Yes	No	No	Yes	Once or several times a month	1 or 2 times a week	Never	Once or several times a month	No	Yes	No	No	No	No	No	No	No	No	No	No	Yes	No	Less than 4 hours a week	I do not do sport	Yes, it has worsened	Athlete	Sedentary	No	No	No	No	Yes	Yes	No	No	No
186	Yes	44	No	Yes	No	No	Yes	No	No	Yes	Never	Once or several times a month	Once or several times a month	Daily	No	Yes	No	No	No	No	No	No	No	No	Yes	No	No	No	More than 8 hours a week	4 to 6 hours per week	Yes, it has worsened	Athlete	Athlete	No	No	No	No	Yes	No	Yes	No	No
187	No	40	No	No	No	No	Yes	No	No	Yes	Once or several times a month	3 or 4 times a week	Daily	5 or 6 times a week	No	No	Yes	No	No	No	No	No	No	No	Yes	No	No	No	Less than 4 hours a week	Less than 4 hours a week	No, it has remained	Athlete	Athlete	No	No	No	No	Yes	Yes	No	No	No
188	No	24	Yes	Yes	No	No	Yes	No	No	Yes	1 or 2 times a week	5 or 6 times a week	3 or 4 times a week	Daily	No	No	Yes	No	No	No	No	Yes	No	No	No	No	No	No	I do not do sport	I do not do sport	No, it has remained	Sedentary	Sedentary	No	No	No	Yes	No	Yes	No	No	No
192	No	24	Yes	Yes	No	Yes	No	Yes	No	No	Once or several times a month	1 or 2 times a week	Once or several times a month	1 or 2 times a week	No	Yes	No	No	No	No	No	No	No	No	No	No	No	Yes	Less than 4 hours a week	I do not do sport	Yes, it has worsened	Athlete	Sedentary	No	No	Yes	No	No	Yes	No	No	No
194	Yes	40	No	No	No	No	Yes	No	No	Yes	Never	Never	3 or 4 times a week	Daily	Yes	No	No	No	No	No	No	No	No	No	No	No	Yes	No	6 to 8 hours per week	6 to 8 hours per week	No, it has remained	Athlete	Athlete	No	No	No	No	Yes	No	No	Yes	No
195	No	21	Yes	Yes	No	Yes	No	Yes	No	No	Once or several times a month	Once or several times a month	1 or 2 times a week	Daily	No	No	Yes	No	Yes	No	No	No	No	No	No	No	No	No	Less than 4 hours a week	Less than 4 hours a week	No, it has remained	Athlete	Athlete	No	No	No	No	Yes	No	No	Yes	No
198	Yes	60	No	No	No	No	Yes	Yes	No	No	Never	1 or 2 times a week	1 or 2 times a week	Daily	No	No	Yes	No	No	No	No	Yes	No	No	No	No	No	No	Less than 4 hours a week	I do not do sport	Yes, it has worsened	Athlete	Sedentary	No	No	No	No	Yes	No	No	Yes	No
199	No	38	No	Yes	No	No	Yes	Yes	No	No	1 or 2 times a week	1 or 2 times a week	1 or 2 times a week	Daily	Yes	No	No	No	No	No	No	No	No	No	Yes	No	No	No	6 to 8 hours per week	I do not do sport	Yes, it has worsened	Athlete	Sedentary	No	No	No	No	Yes	No	No	No	Yes
201	No	33	No	Yes	No	No	Yes	No	No	Yes	Once or several times a month	3 or 4 times a week	Once or several times a month	Daily	Yes	No	No	No	No	No	No	No	No	No	No	No	Yes	No	I do not do sport	I do not do sport	No, it has remained	Sedentary	Sedentary	No	No	No	No	Yes	Yes	No	No	No
202	Yes	18	Yes	Yes	No	No	Yes	Yes	No	No	Once or several times a month	1 or 2 times a week	Once or several times a month	3 or 4 times a week	No	Yes	No	No	No	No	No	No	No	No	No	No	No	Yes	I do not do sport	I do not do sport	No, it has remained	Sedentary	Sedentary	No	No	No	No	Yes	Yes	No	No	No
203	Yes	24	No	Yes	No	No	Yes	No	No	Yes	Once or several times a month	Daily	Once or several times a month	Daily	No	No	Yes	No	No	No	No	No	No	No	No	No	No	Yes	Less than 4 hours a week	4 to 6 hours per week	Yes, it has improved	Athlete	Athlete	No	No	No	No	Yes	Yes	No	No	No
204	Yes	25	Yes	Yes	No	No	Yes	Yes	No	No	5 or 6 times a week	3 or 4 times a week	Once or several times a month	5 or 6 times a week	Yes	No	No	No	Yes	No	No	No	No	No	No	No	No	No	I do not do sport	I do not do sport	No, it has remained	Sedentary	Sedentary	No	No	No	No	Yes	No	No	Yes	No
205	Yes	18	Yes	Yes	No	No	Yes	No	Yes	No	Daily	3 or 4 times a week	1 or 2 times a week	1 or 2 times a week	Yes	No	No	No	Yes	No	No	No	No	No	No	No	No	No	I do not do sport	Less than 4 hours a week	Yes, it has improved	Sedentary	Athlete	No	No	No	No	Yes	Yes	No	No	No
209	No	58	No	No	No	No	Yes	No	No	Yes	Never	1 or 2 times a week	Daily	Daily	Yes	No	No	No	No	No	No	No	No	No	No	No	Yes	No	6 to 8 hours per week	4 to 6 hours per week	Yes, it has worsened	Athlete	Athlete	No	No	No	Yes	No	No	No	Yes	No
210	Yes	52	No	Yes	No	No	Yes	No	No	Yes	Never	Never	5 or 6 times a week	Daily	No	No	Yes	No	No	No	No	No	No	Yes	No	No	No	No	I do not do sport	I do not do sport	No, it has remained	Sedentary	Sedentary	No	Yes	No	No	No	No	No	Yes	No
211	Yes	26	No	Yes	No	No	Yes	No	Yes	No	Once or several times a month	3 or 4 times a week	Once or several times a month	Daily	No	No	Yes	No	No	Yes	No	No	No	No	No	No	No	No	I do not do sport	I do not do sport	No, it has remained	Sedentary	Sedentary	No	No	No	No	Yes	Yes	No	No	No
212	No	58	No	No	No	No	Yes	No	No	Yes	1 or 2 times a week	1 or 2 times a week	Once or several times a month	5 or 6 times a week	Yes	No	No	No	No	No	No	No	No	No	No	Yes	No	No	Less than 4 hours a week	I do not do sport	Yes, it has worsened	Athlete	Sedentary	No	No	No	Yes	No	Yes	No	No	No
213	No	67	No	No	No	No	Yes	No	No	Yes	Never	1 or 2 times a week	Once or several times a month	Daily	Yes	No	No	No	No	No	No	No	No	No	No	No	Yes	No	Less than 4 hours a week	I do not do sport	Yes, it has worsened	Athlete	Sedentary	No	No	No	No	Yes	No	No	Yes	No
215	No	52	No	No	No	No	Yes	No	No	Yes	Once or several times a month	Once or several times a month	Once or several times a month	1 or 2 times a week	Yes	No	No	No	No	No	No	No	No	No	Yes	No	No	No	6 to 8 hours per week	6 to 8 hours per week	No, it has remained	Athlete	Athlete	No	No	No	No	Yes	Yes	No	No	No
217	Yes	20	Yes	Yes	No	No	Yes	No	No	Yes	1 or 2 times a week	1 or 2 times a week	Never	3 or 4 times a week	Yes	No	No	No	Yes	No	No	No	No	No	No	No	No	No	I do not do sport	I do not do sport	No, it has remained	Sedentary	Sedentary	No	No	No	No	Yes	No	No	Yes	No
219	No	23	No	Yes	No	No	Yes	No	No	Yes	1 or 2 times a week	1 or 2 times a week	Once or several times a month	1 or 2 times a week	Yes	No	No	No	No	Yes	No	No	No	No	No	No	No	No	4 to 6 hours per week	4 to 6 hours per week	No, it has remained	Athlete	Athlete	No	No	Yes	No	No	No	No	Yes	No
220	Yes	20	Yes	Yes	No	Yes	No	Yes	No	No	Once or several times a month	5 or 6 times a week	Once or several times a month	Daily	Yes	No	No	No	No	No	No	No	No	No	No	No	No	Yes	I do not do sport	I do not do sport	No, it has remained	Sedentary	Sedentary	Yes	No	No	No	No	Yes	No	No	No
221	Yes	31	No	No	Yes	No	No	No	No	Yes	Never	1 or 2 times a week	1 or 2 times a week	Daily	Yes	No	No	No	No	No	No	No	No	No	No	No	No	Yes	Less than 4 hours a week	4 to 6 hours per week	Yes, it has improved	Athlete	Athlete	No	No	No	No	Yes	Yes	No	No	No
222	Yes	24	Yes	Yes	Yes	No	No	No	No	Yes	Once or several times a month	Once or several times a month	Daily	Daily	Yes	No	No	No	No	No	No	No	No	Yes	No	No	No	No	Less than 4 hours a week	4 to 6 hours per week	Yes, it has improved	Athlete	Athlete	No	No	No	Yes	No	No	No	Yes	No
223	Yes	22	Yes	Yes	No	No	Yes	No	Yes	No	Never	Once or several times a month	Once or several times a month	Daily	No	No	Yes	No	No	No	No	No	Yes	No	No	No	No	No	6 to 8 hours per week	I do not do sport	Yes, it has worsened	Athlete	Sedentary	No	No	No	No	Yes	Yes	No	No	No
224	No	57	No	No	No	No	Yes	No	No	Yes	Never	Once or several times a month	1 or 2 times a week	3 or 4 times a week	No	No	Yes	No	No	No	No	No	No	No	No	No	No	Yes	Less than 4 hours a week	Less than 4 hours a week	No, it has remained	Athlete	Athlete	No	No	No	No	Yes	No	No	Yes	No
225	Yes	53	No	No	Yes	No	No	No	No	Yes	Never	Never	3 or 4 times a week	5 or 6 times a week	Yes	No	No	No	No	No	No	No	No	No	No	Yes	No	No	4 to 6 hours per week	4 to 6 hours per week	No, it has remained	Athlete	Athlete	No	No	No	No	Yes	No	No	Yes	No
226	No	55	No	No	No	Yes	No	No	Yes	No	Once or several times a month	Daily	1 or 2 times a week	Daily	Yes	No	No	No	No	No	No	No	No	No	No	No	Yes	No	Less than 4 hours a week	Less than 4 hours a week	No, it has remained	Athlete	Athlete	No	No	No	No	Yes	No	No	Yes	No
227	Yes	44	No	Yes	No	Yes	No	Yes	No	No	Never	1 or 2 times a week	Once or several times a month	Daily	Yes	No	No	No	No	No	No	No	No	No	Yes	No	No	No	4 to 6 hours per week	4 to 6 hours per week	No, it has remained	Athlete	Athlete	No	No	No	No	Yes	Yes	No	No	No
229	Yes	37	No	No	Yes	No	No	No	Yes	No	Never	1 or 2 times a week	Never	Daily	Yes	No	No	No	No	No	No	No	No	No	No	No	Yes	No	I do not do sport	I do not do sport	No, it has remained	Sedentary	Sedentary	No	No	No	No	Yes	Yes	No	No	No
230	Yes	19	Yes	Yes	No	Yes	No	No	No	Yes	Once or several times a month	5 or 6 times a week	Once or several times a month	Daily	Yes	No	No	No	No	No	No	Yes	No	No	No	No	No	No	4 to 6 hours per week	I do not do sport	Yes, it has worsened	Athlete	Sedentary	No	No	No	No	Yes	Yes	No	No	No
231	Yes	25	Yes	Yes	Yes	No	No	No	Yes	No	Never	3 or 4 times a week	1 or 2 times a week	Daily	Yes	No	No	No	No	No	No	No	No	No	No	No	No	Yes	Less than 4 hours a week	4 to 6 hours per week	Yes, it has improved	Athlete	Athlete	No	No	No	No	Yes	Yes	No	No	No
232	Yes	56	No	No	No	No	Yes	No	No	Yes	1 or 2 times a week	1 or 2 times a week	Never	Daily	No	No	Yes	No	No	No	No	No	No	Yes	No	No	No	No	4 to 6 hours per week	4 to 6 hours per week	No, it has remained	Athlete	Athlete	No	No	No	No	Yes	No	No	Yes	No
235	Yes	44	No	Yes	No	Yes	No	Yes	No	No	Never	Once or several times a month	Once or several times a month	Daily	Yes	No	No	No	No	No	No	No	No	No	Yes	No	No	No	4 to 6 hours per week	4 to 6 hours per week	No, it has remained	Athlete	Athlete	No	No	No	No	Yes	Yes	No	No	No
236	No	24	Yes	No	Yes	No	No	No	No	Yes	Daily	Never	1 or 2 times a week	Daily	No	Yes	No	No	No	Yes	No	No	No	No	No	No	No	No	4 to 6 hours per week	Less than 4 hours a week	Yes, it has worsened	Athlete	Athlete	No	No	No	No	Yes	No	Yes	No	No
237	Yes	20	Yes	Yes	Yes	No	No	No	Yes	No	Once or several times a month	Daily	Once or several times a month	Daily	Yes	No	No	No	No	No	No	No	No	No	No	Yes	No	No	I do not do sport	6 to 8 hours per week	Yes, it has improved	Sedentary	Athlete	No	No	No	No	Yes	Yes	No	No	No
238	No	42	No	No	Yes	No	No	No	Yes	No	1 or 2 times a week	1 or 2 times a week	1 or 2 times a week	5 or 6 times a week	No	No	Yes	No	No	No	No	No	No	No	No	No	Yes	No	Less than 4 hours a week	Less than 4 hours a week	No, it has remained	Athlete	Athlete	No	No	No	No	Yes	No	No	Yes	No
239	No	18	Yes	Yes	No	No	Yes	No	No	Yes	Once or several times a month	1 or 2 times a week	1 or 2 times a week	3 or 4 times a week	No	Yes	No	No	No	No	Yes	No	No	No	No	No	No	No	More than 8 hours a week	More than 8 hours a week	No, it has remained	Athlete	Athlete	No	No	No	No	Yes	Yes	No	No	No
240	Yes	26	No	Yes	No	No	Yes	Yes	No	No	1 or 2 times a week	3 or 4 times a week	Once or several times a month	5 or 6 times a week	No	No	Yes	No	No	Yes	No	No	No	No	No	No	No	No	Less than 4 hours a week	Less than 4 hours a week	No, it has remained	Athlete	Athlete	No	No	No	No	Yes	Yes	No	No	No
241	Yes	69 años	No	No	No	No	Yes	No	No	Yes	Never	Once or several times a month	1 or 2 times a week	Daily	No	Yes	No	No	No	No	No	No	No	No	Yes	No	No	No	More than 8 hours a week	Less than 4 hours a week	Yes, it has worsened	Athlete	Athlete	No	No	No	Yes	No	No	No	Yes	No
242	No	18	Yes	Yes	No	No	Yes	No	No	Yes	Never	Daily	Never	5 or 6 times a week	No	No	Yes	No	No	No	Yes	No	No	No	No	No	No	No	I do not do sport	I do not do sport	No, it has remained	Sedentary	Sedentary	No	No	No	No	Yes	Yes	No	No	No
243	Yes	19	Yes	Yes	No	Yes	No	No	No	Yes	1 or 2 times a week	1 or 2 times a week	Never	5 or 6 times a week	Yes	No	No	No	No	No	No	No	No	No	No	No	No	Yes	I do not do sport	I do not do sport	No, it has remained	Sedentary	Sedentary	No	No	No	No	Yes	Yes	No	No	No
245	No	55	No	No	No	No	Yes	Yes	No	No	1 or 2 times a week	Once or several times a month	Once or several times a month	1 or 2 times a week	No	No	Yes	No	No	No	No	No	No	No	No	No	Yes	No	I do not do sport	I do not do sport	No, it has remained	Sedentary	Sedentary	No	No	No	No	Yes	No	No	Yes	No
246	Yes	28	No	No	Yes	No	No	No	No	Yes	Never	Daily	3 or 4 times a week	Daily	No	No	Yes	No	No	No	No	No	No	No	No	No	No	Yes	I do not do sport	4 to 6 hours per week	Yes, it has improved	Sedentary	Athlete	No	No	No	No	Yes	No	No	Yes	No
247	Yes	49	No	No	No	No	Yes	No	Yes	No	Never	Never	1 or 2 times a week	3 or 4 times a week	Yes	No	No	No	No	No	No	No	No	No	No	Yes	No	No	I do not do sport	I do not do sport	No, it has remained	Sedentary	Sedentary	No	No	No	Yes	No	Yes	No	No	No
248	Yes	57	No	No	No	No	Yes	Yes	No	No	Never	Never	1 or 2 times a week	Daily	Yes	No	No	No	No	No	No	No	No	No	No	No	Yes	No	More than 8 hours a week	4 to 6 hours per week	Yes, it has worsened	Athlete	Athlete	No	No	No	No	Yes	No	No	Yes	No
249	Yes	56	No	No	No	No	Yes	No	Yes	No	Never	5 or 6 times a week	5 or 6 times a week	Daily	Yes	No	No	No	No	No	No	Yes	No	No	No	No	No	No	Less than 4 hours a week	More than 8 hours a week	Yes, it has improved	Athlete	Athlete	No	No	No	No	Yes	No	No	Yes	No
250	No	50	No	No	No	Yes	No	Yes	No	No	Never	5 or 6 times a week	1 or 2 times a week	Daily	Yes	No	No	No	No	No	No	No	No	No	No	No	Yes	No	4 to 6 hours per week	4 to 6 hours per week	No, it has remained	Athlete	Athlete	No	No	No	No	Yes	No	No	Yes	No
251	Yes	18	Yes	Yes	No	No	Yes	No	No	Yes	Never	Never	Once or several times a month	3 or 4 times a week	Yes	No	No	No	No	No	No	No	No	No	No	No	No	Yes	I do not do sport	4 to 6 hours per week	Yes, it has improved	Sedentary	Athlete	No	No	No	No	Yes	No	No	Yes	No
252	No	56	No	No	No	No	Yes	No	No	Yes	1 or 2 times a week	1 or 2 times a week	3 or 4 times a week	Daily	No	No	Yes	No	No	No	No	No	No	No	No	Yes	No	No	Less than 4 hours a week	I do not do sport	Yes, it has worsened	Athlete	Sedentary	No	No	No	No	Yes	No	No	Yes	No
253	No	71	No	No	No	Yes	No	No	No	Yes	Never	Once or several times a month	3 or 4 times a week	Daily	Yes	No	No	No	No	No	No	No	No	Yes	No	No	No	No	4 to 6 hours per week	4 to 6 hours per week	No, it has remained	Athlete	Athlete	No	No	No	No	Yes	Yes	No	No	No
254	Yes	18	Yes	Yes	No	No	Yes	No	No	Yes	Once or several times a month	3 or 4 times a week	Never	5 or 6 times a week	No	No	Yes	No	No	No	No	No	No	Yes	No	No	No	No	4 to 6 hours per week	4 to 6 hours per week	No, it has remained	Athlete	Athlete	No	No	No	No	Yes	No	No	Yes	No
255	Yes	20	Yes	Yes	No	Yes	No	Yes	No	No	Once or several times a month	Daily	Never	3 or 4 times a week	No	Yes	No	No	No	No	Yes	No	No	No	No	No	No	No	I do not do sport	Less than 4 hours a week	Yes, it has improved	Sedentary	Athlete	No	No	No	No	Yes	Yes	No	No	No
256	No	49	No	Yes	No	No	Yes	No	No	Yes	Never	5 or 6 times a week	1 or 2 times a week	5 or 6 times a week	No	No	Yes	No	Yes	No	No	No	No	No	No	No	No	No	Less than 4 hours a week	Less than 4 hours a week	No, it has remained	Athlete	Athlete	No	No	No	No	Yes	Yes	No	No	No
257	Yes	18	Yes	Yes	No	No	Yes	No	No	Yes	Once or several times a month	1 or 2 times a week	Once or several times a month	3 or 4 times a week	Yes	No	No	No	No	No	No	No	No	No	No	No	No	Yes	Less than 4 hours a week	4 to 6 hours per week	Yes, it has improved	Athlete	Athlete	No	No	No	No	Yes	Yes	No	No	No
262	No	68	No	No	No	No	Yes	No	No	Yes	Once or several times a month	1 or 2 times a week	Daily	Daily	No	No	Yes	No	No	No	No	No	No	No	No	Yes	No	No	I do not do sport	I do not do sport	No, it has remained	Sedentary	Sedentary	No	No	Yes	No	No	Yes	No	No	No
264	Yes	18	Yes	Yes	No	No	Yes	No	No	Yes	Never	Daily	Once or several times a month	1 or 2 times a week	No	No	Yes	No	No	No	No	No	No	No	No	No	No	Yes	4 to 6 hours per week	I do not do sport	Yes, it has worsened	Athlete	Sedentary	No	No	No	No	Yes	Yes	No	No	No
265	Yes	43	Yes	Yes	No	No	Yes	No	No	Yes	Never	Never	Never	Daily	Yes	No	No	No	Yes	No	No	No	No	No	No	No	No	No	Less than 4 hours a week	Less than 4 hours a week	No, it has remained	Athlete	Athlete	No	No	No	No	Yes	Yes	No	No	No
268	No	24	No	Yes	No	Yes	No	Yes	No	No	Once or several times a month	Never	Never	3 or 4 times a week	Yes	No	No	No	No	Yes	No	No	No	No	No	No	No	No	Less than 4 hours a week	Less than 4 hours a week	No, it has remained	Athlete	Athlete	No	No	No	No	Yes	No	Yes	No	No
269	Yes	20	Yes	Yes	No	No	Yes	Yes	No	No	Once or several times a month	1 or 2 times a week	Once or several times a month	5 or 6 times a week	No	No	Yes	No	Yes	No	No	No	No	No	No	No	No	No	More than 8 hours a week	Less than 4 hours a week	Yes, it has worsened	Athlete	Athlete	No	No	No	No	Yes	No	No	Yes	No
271	Yes	70	No	No	No	No	Yes	No	No	Yes	Never	3 or 4 times a week	Daily	5 or 6 times a week	Yes	No	No	No	No	No	No	No	No	Yes	No	No	No	No	Less than 4 hours a week	I do not do sport	Yes, it has worsened	Athlete	Sedentary	No	No	No	Yes	No	Yes	No	No	No
272	No	21	Yes	Yes	No	Yes	No	Yes	No	No	1 or 2 times a week	Daily	Never	Daily	No	Yes	No	No	No	No	Yes	No	No	No	No	No	No	No	Less than 4 hours a week	I do not do sport	Yes, it has worsened	Athlete	Sedentary	No	No	No	No	Yes	Yes	No	No	No
273	Yes	22	Yes	Yes	No	No	Yes	No	No	Yes	Once or several times a month	1 or 2 times a week	Never	Daily	Yes	No	No	No	No	No	No	No	No	No	No	No	Yes	No	I do not do sport	Less than 4 hours a week	Yes, it has improved	Sedentary	Athlete	No	No	No	No	Yes	Yes	No	No	No
274	Yes	41	No	Yes	Yes	No	No	No	Yes	No	Never	Once or several times a month	Never	Daily	Yes	No	No	No	No	No	No	No	No	Yes	No	No	No	No	4 to 6 hours per week	4 to 6 hours per week	No, it has remained	Athlete	Athlete	No	No	No	No	Yes	Yes	No	No	No
278	No	19	Yes	Yes	No	No	Yes	Yes	No	No	Once or several times a month	Once or several times a month	Never	5 or 6 times a week	No	Yes	No	No	No	No	No	No	No	No	Yes	No	No	No	More than 8 hours a week	More than 8 hours a week	No, it has remained	Athlete	Athlete	No	No	No	No	Yes	Yes	No	No	No
281	Yes	41	No	No	No	No	Yes	Yes	No	No	Never	1 or 2 times a week	Once or several times a month	Daily	No	No	Yes	No	No	No	No	No	No	No	No	No	Yes	No	4 to 6 hours per week	4 to 6 hours per week	No, it has remained	Athlete	Athlete	No	No	No	No	Yes	No	No	No	Yes
282	Yes	37	No	Yes	Yes	No	No	No	Yes	No	Once or several times a month	Once or several times a month	Once or several times a month	Daily	No	No	Yes	No	No	No	No	No	No	No	No	Yes	No	No	I do not do sport	Less than 4 hours a week	Yes, it has improved	Sedentary	Athlete	No	No	No	No	Yes	Yes	No	No	No
283	Yes	37	No	No	No	Yes	No	Yes	No	No	1 or 2 times a week	1 or 2 times a week	1 or 2 times a week	Daily	Yes	No	No	No	No	No	No	No	No	No	No	Yes	No	No	I do not do sport	I do not do sport	No, it has remained	Sedentary	Sedentary	No	No	No	Yes	No	Yes	No	No	No
284	No	65	No	No	No	No	Yes	No	No	Yes	Never	5 or 6 times a week	Never	Daily	No	No	Yes	No	No	No	No	No	No	No	No	Yes	No	No	6 to 8 hours per week	4 to 6 hours per week	Yes, it has worsened	Athlete	Athlete	No	No	No	No	Yes	Yes	No	No	No
286	No	47	No	Yes	No	No	Yes	Yes	No	No	1 or 2 times a week	1 or 2 times a week	Once or several times a month	Daily	No	No	Yes	No	No	No	No	No	No	No	No	No	No	Yes	I do not do sport	I do not do sport	No, it has remained	Sedentary	Sedentary	No	No	Yes	No	No	No	No	Yes	No
287	Yes	21	Yes	Yes	No	No	Yes	No	No	Yes	Once or several times a month	1 or 2 times a week	Once or several times a month	Daily	Yes	No	No	No	No	No	No	No	No	No	No	No	No	Yes	I do not do sport	I do not do sport	No, it has remained	Sedentary	Sedentary	No	No	No	No	Yes	No	No	Yes	No
288	Yes	34	No	No	No	No	Yes	No	No	Yes	Never	1 or 2 times a week	Never	Daily	No	No	Yes	No	No	Yes	No	No	No	No	No	No	No	No	Less than 4 hours a week	Less than 4 hours a week	No, it has remained	Athlete	Athlete	No	No	No	No	Yes	Yes	No	No	No
289	Yes	19	Yes	Yes	No	No	Yes	No	No	Yes	3 or 4 times a week	1 or 2 times a week	Once or several times a month	5 or 6 times a week	No	No	Yes	No	No	No	No	No	No	No	No	No	Yes	No	Less than 4 hours a week	Less than 4 hours a week	No, it has remained	Athlete	Athlete	No	No	No	No	Yes	No	No	Yes	No
290	Yes	60	Yes	No	No	No	Yes	No	Yes	No	Never	1 or 2 times a week	Never	Daily	No	No	Yes	No	No	No	No	No	No	No	No	Yes	No	No	I do not do sport	I do not do sport	No, it has remained	Sedentary	Sedentary	No	No	No	No	Yes	No	No	Yes	No
291	Yes	70	No	No	No	No	Yes	No	No	Yes	Never	3 or 4 times a week	Never	3 or 4 times a week	No	Yes	No	No	No	No	No	No	No	No	Yes	No	No	No	More than 8 hours a week	More than 8 hours a week	No, it has remained	Athlete	Athlete	No	No	No	Yes	No	Yes	No	No	No
292	Yes	37	Yes	Yes	No	Yes	No	Yes	No	No	3 or 4 times a week	3 or 4 times a week	5 or 6 times a week	5 or 6 times a week	No	No	Yes	No	Yes	No	No	No	No	No	No	No	No	No	I do not do sport	I do not do sport	No, it has remained	Sedentary	Sedentary	No	No	No	No	Yes	No	No	Yes	No
293	Yes	39	No	Yes	No	No	Yes	No	No	Yes	Once or several times a month	1 or 2 times a week	1 or 2 times a week	1 or 2 times a week	No	No	Yes	No	No	No	Yes	No	No	No	No	No	No	No	Less than 4 hours a week	Less than 4 hours a week	No, it has remained	Athlete	Athlete	No	No	No	Yes	No	No	No	Yes	No
294	Yes	26	Yes	Yes	No	No	Yes	No	Yes	No	Never	Once or several times a month	Never	Daily	Yes	No	No	No	No	No	No	No	No	No	No	No	Yes	No	4 to 6 hours per week	4 to 6 hours per week	No, it has remained	Athlete	Athlete	No	No	No	No	Yes	Yes	No	No	No
295	Yes	21	Yes	Yes	No	No	Yes	No	No	Yes	Never	3 or 4 times a week	Once or several times a month	5 or 6 times a week	No	No	Yes	No	No	No	No	No	No	No	No	Yes	No	No	Less than 4 hours a week	Less than 4 hours a week	No, it has remained	Athlete	Athlete	No	No	No	No	Yes	No	No	Yes	No
297	Yes	48	Yes	No	No	No	Yes	Yes	No	No	3 or 4 times a week	Once or several times a month	Never	Daily	Yes	No	No	No	No	No	No	No	No	No	No	Yes	No	No	I do not do sport	Less than 4 hours a week	Yes, it has improved	Sedentary	Athlete	No	No	No	No	Yes	Yes	No	No	No
299	Yes	18	Yes	Yes	No	No	Yes	No	Yes	No	1 or 2 times a week	3 or 4 times a week	1 or 2 times a week	Daily	No	No	Yes	No	No	No	No	No	No	No	No	No	No	Yes	Less than 4 hours a week	I do not do sport	Yes, it has worsened	Athlete	Sedentary	No	No	No	Yes	No	No	No	Yes	No
300	No	23	Yes	Yes	No	Yes	No	No	No	Yes	Once or several times a month	3 or 4 times a week	Never	Daily	No	No	Yes	Yes	No	No	No	No	No	No	No	No	No	No	6 to 8 hours per week	6 to 8 hours per week	No, it has remained	Athlete	Athlete	No	No	No	No	Yes	No	No	Yes	No
301	Yes	21	Yes	Yes	No	No	Yes	No	Yes	No	1 or 2 times a week	1 or 2 times a week	1 or 2 times a week	1 or 2 times a week	Yes	No	No	No	No	No	No	No	No	No	No	No	No	Yes	I do not do sport	I do not do sport	No, it has remained	Sedentary	Sedentary	No	Yes	No	No	No	Yes	No	No	No
302	Yes	23	No	Yes	No	Yes	No	Yes	No	No	Never	3 or 4 times a week	Never	Daily	Yes	No	No	No	No	No	No	No	No	No	No	No	Yes	No	6 to 8 hours per week	4 to 6 hours per week	Yes, it has worsened	Athlete	Athlete	No	No	No	No	Yes	Yes	No	No	No
303	Yes	26	Yes	Yes	Yes	No	No	No	No	Yes	1 or 2 times a week	3 or 4 times a week	Never	Daily	No	Yes	No	No	No	Yes	No	No	No	No	No	No	No	No	I do not do sport	6 to 8 hours per week	Yes, it has improved	Sedentary	Athlete	No	No	No	No	Yes	Yes	No	No	No
304	Yes	26	No	Yes	No	No	Yes	No	No	Yes	Never	Never	Once or several times a month	Daily	Yes	No	No	No	No	No	No	No	No	No	No	No	No	Yes	Less than 4 hours a week	Less than 4 hours a week	No, it has remained	Athlete	Athlete	No	No	No	No	Yes	No	No	Yes	No
305	No	52	No	No	No	No	Yes	Yes	No	No	Never	1 or 2 times a week	Once or several times a month	Daily	No	Yes	No	No	No	No	No	No	No	No	No	No	Yes	No	4 to 6 hours per week	More than 8 hours a week	Yes, it has improved	Athlete	Athlete	No	No	Yes	No	No	No	No	Yes	No
306	Yes	20	Yes	Yes	No	No	Yes	No	No	Yes	1 or 2 times a week	Daily	Once or several times a month	5 or 6 times a week	No	Yes	No	Yes	No	No	No	No	No	No	No	No	No	No	4 to 6 hours per week	4 to 6 hours per week	No, it has remained	Athlete	Athlete	No	No	No	No	Yes	No	No	Yes	No
307	No	58	No	No	No	No	Yes	No	No	Yes	Never	1 or 2 times a week	1 or 2 times a week	5 or 6 times a week	Yes	No	No	No	No	No	No	No	No	No	Yes	No	No	No	6 to 8 hours per week	Less than 4 hours a week	Yes, it has worsened	Athlete	Athlete	No	No	No	No	Yes	No	No	Yes	No
308	Yes	19	Yes	Yes	No	No	Yes	No	No	Yes	1 or 2 times a week	Daily	Once or several times a month	Daily	No	No	Yes	Yes	No	No	No	No	No	No	No	No	No	No	Less than 4 hours a week	Less than 4 hours a week	No, it has remained	Athlete	Athlete	No	No	No	No	Yes	No	No	Yes	No
310	Yes	19	Yes	Yes	No	No	Yes	No	No	Yes	Never	1 or 2 times a week	Never	3 or 4 times a week	Yes	No	No	No	No	No	No	No	No	No	No	No	No	Yes	I do not do sport	Less than 4 hours a week	Yes, it has improved	Sedentary	Athlete	No	No	No	No	Yes	No	No	Yes	No
313	No	56	No	No	No	No	Yes	No	No	Yes	Never	Once or several times a month	Never	Daily	No	No	Yes	No	No	No	No	No	No	Yes	No	No	No	No	I do not do sport	I do not do sport	No, it has remained	Sedentary	Sedentary	No	No	No	No	Yes	No	No	Yes	No
314	Yes	19	Yes	Yes	No	Yes	No	Yes	No	No	1 or 2 times a week	1 or 2 times a week	Once or several times a month	1 or 2 times a week	No	Yes	No	No	No	Yes	No	No	No	No	No	No	No	No	I do not do sport	I do not do sport	No, it has remained	Sedentary	Sedentary	No	No	No	No	Yes	Yes	No	No	No
315	No	20	Yes	Yes	No	No	Yes	No	Yes	No	Once or several times a month	Once or several times a month	Once or several times a month	3 or 4 times a week	No	Yes	No	No	No	No	No	No	No	No	No	No	No	Yes	4 to 6 hours per week	I do not do sport	Yes, it has worsened	Athlete	Sedentary	No	No	No	No	Yes	No	No	Yes	No
317	Yes	20	Yes	Yes	Yes	No	No	No	Yes	No	Never	1 or 2 times a week	Never	Daily	No	Yes	No	No	No	No	No	No	No	No	No	No	No	Yes	4 to 6 hours per week	More than 8 hours a week	Yes, it has improved	Athlete	Athlete	No	No	No	No	Yes	Yes	No	No	No
319	No	23	No	Yes	No	Yes	No	Yes	No	No	Never	1 or 2 times a week	1 or 2 times a week	Daily	Yes	No	No	No	No	No	No	No	No	No	No	No	Yes	No	Less than 4 hours a week	I do not do sport	Yes, it has worsened	Athlete	Sedentary	No	No	No	No	Yes	Yes	No	No	No
320	Yes	24	No	Yes	Yes	No	No	No	No	Yes	Never	Once or several times a month	Never	Daily	Yes	No	No	No	No	Yes	No	No	No	No	No	No	No	No	4 to 6 hours per week	Less than 4 hours a week	Yes, it has worsened	Athlete	Athlete	No	No	No	No	Yes	Yes	No	No	No
321	Yes	49 años	No	No	No	No	Yes	Yes	No	No	1 or 2 times a week	1 or 2 times a week	Never	Daily	Yes	No	No	No	No	No	No	No	No	No	No	Yes	No	No	Less than 4 hours a week	I do not do sport	Yes, it has worsened	Athlete	Sedentary	No	No	No	No	Yes	Yes	No	No	No
322	No	29	No	Yes	No	No	Yes	No	No	Yes	Never	Never	Once or several times a month	Daily	Yes	No	No	No	No	No	No	Yes	No	No	No	No	No	No	More than 8 hours a week	6 to 8 hours per week	Yes, it has worsened	Athlete	Athlete	No	No	No	No	Yes	No	No	Yes	No
324	Yes	25	No	Yes	No	Yes	No	Yes	No	No	Once or several times a month	Daily	Never	5 or 6 times a week	No	Yes	No	No	No	No	No	No	No	Yes	No	No	No	No	I do not do sport	I do not do sport	No, it has remained	Sedentary	Sedentary	No	No	No	No	Yes	Yes	No	No	No
325	No	18	Yes	Yes	No	Yes	No	Yes	No	No	Once or several times a month	Daily	Once or several times a month	3 or 4 times a week	Yes	No	No	No	No	No	No	No	Yes	No	No	No	No	No	4 to 6 hours per week	Less than 4 hours a week	Yes, it has worsened	Athlete	Athlete	No	No	No	No	Yes	Yes	No	No	No
326	Yes	23	Yes	Yes	No	No	Yes	No	Yes	No	1 or 2 times a week	Once or several times a month	Once or several times a month	Daily	Yes	No	No	No	No	No	No	No	No	No	No	Yes	No	No	I do not do sport	Less than 4 hours a week	Yes, it has improved	Sedentary	Athlete	No	No	No	Yes	No	No	Yes	No	No
328	No	72	No	No	No	No	Yes	No	No	Yes	Once or several times a month	1 or 2 times a week	1 or 2 times a week	3 or 4 times a week	No	No	Yes	No	No	No	No	No	No	No	No	Yes	No	No	6 to 8 hours per week	6 to 8 hours per week	No, it has remained	Athlete	Athlete	No	No	No	No	Yes	No	No	Yes	No
331	Yes	28	No	Yes	No	No	Yes	No	No	Yes	Never	Never	Never	Daily	Yes	No	No	No	No	No	No	No	No	No	No	No	No	Yes	Less than 4 hours a week	Less than 4 hours a week	No, it has remained	Athlete	Athlete	No	No	No	No	Yes	No	Yes	No	No
332	Yes	21	Yes	Yes	No	No	Yes	No	Yes	No	1 or 2 times a week	Once or several times a month	Never	1 or 2 times a week	No	Yes	No	No	No	No	No	No	No	No	No	No	No	Yes	6 to 8 hours per week	4 to 6 hours per week	Yes, it has worsened	Athlete	Athlete	No	No	No	No	Yes	Yes	No	No	No
333	Yes	25	Yes	Yes	No	No	Yes	No	No	Yes	Never	3 or 4 times a week	1 or 2 times a week	Daily	Yes	No	No	No	No	No	No	No	No	No	No	No	Yes	No	4 to 6 hours per week	4 to 6 hours per week	No, it has remained	Athlete	Athlete	No	No	No	No	Yes	Yes	No	No	No
334	Yes	21	Yes	Yes	Yes	No	No	No	Yes	No	Once or several times a month	Once or several times a month	Never	Daily	Yes	No	No	No	Yes	No	No	No	No	No	No	No	No	No	I do not do sport	6 to 8 hours per week	Yes, it has improved	Sedentary	Athlete	No	No	No	No	Yes	No	No	Yes	No
335	No	25	Yes	Yes	No	Yes	No	No	Yes	No	Never	Never	Daily	Never	No	Yes	No	No	Yes	No	No	No	No	No	No	No	No	No	4 to 6 hours per week	I do not do sport	Yes, it has worsened	Athlete	Sedentary	No	No	No	No	Yes	No	No	No	Yes
336	Yes	44	No	No	No	No	Yes	No	No	Yes	1 or 2 times a week	1 or 2 times a week	Never	5 or 6 times a week	Yes	No	No	No	No	No	No	No	No	No	Yes	No	No	No	I do not do sport	I do not do sport	No, it has remained	Sedentary	Sedentary	No	No	No	No	Yes	Yes	No	No	No
337	Yes	21	Yes	Yes	No	Yes	No	Yes	No	No	1 or 2 times a week	5 or 6 times a week	1 or 2 times a week	5 or 6 times a week	No	Yes	No	No	No	No	No	No	No	Yes	No	No	No	No	I do not do sport	I do not do sport	No, it has remained	Sedentary	Sedentary	No	No	No	No	Yes	Yes	No	No	No
338	No	33	No	Yes	No	Yes	No	Yes	No	No	5 or 6 times a week	1 or 2 times a week	Once or several times a month	5 or 6 times a week	Yes	No	No	No	Yes	No	No	No	No	No	No	No	No	No	I do not do sport	Less than 4 hours a week	Yes, it has improved	Sedentary	Athlete	No	No	No	No	Yes	Yes	No	No	No
339	No	64	No	No	No	No	Yes	Yes	No	No	Never	3 or 4 times a week	Daily	Daily	Yes	No	No	No	No	No	No	No	No	Yes	No	No	No	No	I do not do sport	Less than 4 hours a week	Yes, it has improved	Sedentary	Athlete	No	No	No	No	Yes	Yes	No	No	No
340	Yes	22	Yes	No	No	Yes	No	Yes	No	No	1 or 2 times a week	Once or several times a month	Once or several times a month	3 or 4 times a week	No	No	Yes	No	Yes	No	No	No	No	No	No	No	No	No	Less than 4 hours a week	I do not do sport	Yes, it has worsened	Athlete	Sedentary	No	No	No	No	Yes	Yes	No	No	No
341	No	23	Yes	Yes	Yes	No	No	No	Yes	No	Daily	1 or 2 times a week	Once or several times a month	Daily	Yes	No	No	No	No	Yes	No	No	No	No	No	No	No	No	More than 8 hours a week	4 to 6 hours per week	Yes, it has worsened	Athlete	Athlete	No	No	No	No	Yes	No	No	Yes	No
342	Yes	20	Yes	Yes	No	No	Yes	No	No	Yes	Never	Daily	Once or several times a month	Daily	No	No	Yes	No	No	No	No	No	No	No	Yes	No	No	No	4 to 6 hours per week	4 to 6 hours per week	No, it has remained	Athlete	Athlete	No	No	No	No	Yes	Yes	No	No	No
343	Yes	24	Yes	Yes	No	Yes	No	Yes	No	No	3 or 4 times a week	3 or 4 times a week	Once or several times a month	Once or several times a month	No	Yes	No	No	Yes	No	No	No	No	No	No	No	No	No	More than 8 hours a week	6 to 8 hours per week	Yes, it has worsened	Athlete	Athlete	No	No	Yes	No	No	Yes	No	No	No
344	No	25	No	Yes	No	No	Yes	No	No	Yes	Once or several times a month	5 or 6 times a week	Once or several times a month	Daily	No	Yes	No	Yes	No	No	No	No	No	No	No	No	No	No	Less than 4 hours a week	Less than 4 hours a week	No, it has remained	Athlete	Athlete	No	No	No	No	Yes	Yes	No	No	No
345	Yes	22	Yes	Yes	No	Yes	No	Yes	No	No	Never	5 or 6 times a week	Never	3 or 4 times a week	Yes	No	No	No	No	No	No	No	No	No	No	No	No	Yes	Less than 4 hours a week	I do not do sport	Yes, it has worsened	Athlete	Sedentary	No	No	No	No	Yes	No	No	Yes	No
346	Yes	18	Yes	No	No	No	Yes	No	Yes	No	Daily	Daily	Never	Daily	No	Yes	No	No	Yes	No	No	No	No	No	No	No	No	No	I do not do sport	I do not do sport	No, it has remained	Sedentary	Sedentary	No	No	No	No	Yes	Yes	No	No	No
347	Yes	30	No	Yes	Yes	No	No	No	Yes	No	Never	3 or 4 times a week	1 or 2 times a week	5 or 6 times a week	No	No	Yes	No	No	Yes	No	No	No	No	No	No	No	No	Less than 4 hours a week	4 to 6 hours per week	Yes, it has improved	Athlete	Athlete	No	No	No	No	Yes	No	No	Yes	No
348	Yes	18	Yes	Yes	No	No	Yes	No	No	Yes	1 or 2 times a week	3 or 4 times a week	1 or 2 times a week	1 or 2 times a week	No	No	Yes	No	No	No	No	No	No	No	No	No	No	Yes	I do not do sport	I do not do sport	No, it has remained	Sedentary	Sedentary	No	No	No	No	Yes	No	No	Yes	No
349	No	35	No	Yes	No	No	Yes	No	No	Yes	Never	Never	3 or 4 times a week	Daily	Yes	No	No	No	No	No	No	No	No	No	No	Yes	No	No	Less than 4 hours a week	Less than 4 hours a week	No, it has remained	Athlete	Athlete	No	No	No	Yes	No	No	No	Yes	No
350	Yes	28	No	No	No	No	Yes	No	Yes	No	Once or several times a month	Once or several times a month	Never	Daily	Yes	No	No	No	No	No	No	No	No	No	Yes	No	No	No	More than 8 hours a week	4 to 6 hours per week	Yes, it has worsened	Athlete	Athlete	No	No	No	No	Yes	Yes	No	No	No
351	No	32	No	Yes	No	No	Yes	No	No	Yes	1 or 2 times a week	Once or several times a month	Never	Daily	Yes	No	No	No	No	Yes	No	No	No	No	No	No	No	No	Less than 4 hours a week	Less than 4 hours a week	No, it has remained	Athlete	Athlete	No	No	No	No	Yes	Yes	No	No	No
352	Yes	39	No	Yes	Yes	No	No	No	Yes	No	Never	Once or several times a month	Once or several times a month	Daily	Yes	No	No	No	No	No	No	No	No	Yes	No	No	No	No	Less than 4 hours a week	4 to 6 hours per week	Yes, it has improved	Athlete	Athlete	No	No	No	No	Yes	No	No	Yes	No
353	Yes	56	No	No	Yes	No	No	No	No	Yes	Never	Once or several times a month	3 or 4 times a week	Daily	No	No	Yes	No	No	No	No	No	No	No	No	No	Yes	No	Less than 4 hours a week	Less than 4 hours a week	No, it has remained	Athlete	Athlete	Yes	No	No	No	No	Yes	No	No	No
355	Yes	56	No	No	No	No	Yes	No	No	Yes	1 or 2 times a week	1 or 2 times a week	Once or several times a month	1 or 2 times a week	Yes	No	No	No	No	No	No	No	No	No	No	No	No	Yes	I do not do sport	I do not do sport	No, it has remained	Sedentary	Sedentary	No	No	No	Yes	No	No	No	Yes	No
356	No	23	No	Yes	Yes	No	No	No	Yes	No	Never	3 or 4 times a week	1 or 2 times a week	Daily	Yes	No	No	No	No	Yes	No	No	No	No	No	No	No	No	Less than 4 hours a week	More than 8 hours a week	Yes, it has improved	Athlete	Athlete	No	No	No	No	Yes	Yes	No	No	No
357	Yes	50	No	No	No	No	Yes	No	No	Yes	Never	Never	1 or 2 times a week	Daily	Yes	No	No	No	No	No	No	No	No	No	No	No	No	Yes	Less than 4 hours a week	4 to 6 hours per week	Yes, it has improved	Athlete	Athlete	No	No	No	No	Yes	Yes	No	No	No
358	No	45	No	No	No	Yes	No	Yes	No	No	Never	Daily	3 or 4 times a week	5 or 6 times a week	Yes	No	No	No	No	No	No	No	No	No	No	Yes	No	No	6 to 8 hours per week	Less than 4 hours a week	Yes, it has worsened	Athlete	Athlete	No	No	No	No	Yes	Yes	No	No	No
359	No	25	No	Yes	No	No	Yes	No	No	Yes	Never	Never	Never	5 or 6 times a week	No	Yes	No	No	No	No	No	No	Yes	No	No	No	No	No	4 to 6 hours per week	4 to 6 hours per week	No, it has remained	Athlete	Athlete	No	No	No	No	Yes	Yes	No	No	No
360	Yes	37	No	Yes	No	No	Yes	No	No	Yes	Once or several times a month	3 or 4 times a week	Once or several times a month	Daily	No	No	Yes	No	No	No	No	No	No	No	Yes	No	No	No	Less than 4 hours a week	4 to 6 hours per week	Yes, it has improved	Athlete	Athlete	No	No	Yes	No	No	No	No	Yes	No
361	Yes	24	No	Yes	No	No	Yes	Yes	No	No	Never	1 or 2 times a week	Once or several times a month	3 or 4 times a week	No	No	Yes	No	No	Yes	No	No	No	No	No	No	No	No	6 to 8 hours per week	Less than 4 hours a week	Yes, it has worsened	Athlete	Athlete	No	No	No	No	Yes	No	No	Yes	No
362	Yes	22	Yes	Yes	No	Yes	No	No	No	Yes	1 or 2 times a week	Daily	Once or several times a month	3 or 4 times a week	No	Yes	No	No	No	No	No	Yes	No	No	No	No	No	No	4 to 6 hours per week	Less than 4 hours a week	Yes, it has worsened	Athlete	Athlete	No	No	No	No	Yes	Yes	No	No	No
364	Yes	32	No	Yes	No	No	Yes	No	No	Yes	Never	Daily	Never	Daily	No	No	Yes	No	No	No	Yes	No	No	No	No	No	No	No	6 to 8 hours per week	6 to 8 hours per week	No, it has remained	Athlete	Athlete	No	No	No	No	Yes	No	No	Yes	No
365	Yes	60	No	No	No	No	Yes	No	No	Yes	Never	1 or 2 times a week	1 or 2 times a week	Daily	No	No	Yes	No	No	No	No	No	No	No	No	No	Yes	No	Less than 4 hours a week	4 to 6 hours per week	Yes, it has improved	Athlete	Athlete	No	No	No	No	Yes	Yes	No	No	No
366	Yes	58	No	No	No	No	Yes	No	No	Yes	Never	1 or 2 times a week	Once or several times a month	3 or 4 times a week	No	No	Yes	No	No	No	No	No	No	No	No	No	Yes	No	Less than 4 hours a week	Less than 4 hours a week	No, it has remained	Athlete	Athlete	No	No	No	Yes	No	Yes	No	No	No
367	Yes	59	No	No	No	Yes	No	No	Yes	No	Never	1 or 2 times a week	Once or several times a month	3 or 4 times a week	No	No	Yes	No	No	No	No	No	No	No	Yes	No	No	No	Less than 4 hours a week	I do not do sport	Yes, it has worsened	Athlete	Sedentary	No	No	No	No	Yes	Yes	No	No	No
368	Yes	30	Yes	No	No	No	Yes	No	No	Yes	Once or several times a month	1 or 2 times a week	1 or 2 times a week	3 or 4 times a week	No	No	Yes	No	No	Yes	No	No	No	No	No	No	No	No	I do not do sport	Less than 4 hours a week	Yes, it has improved	Sedentary	Athlete	No	Yes	No	No	No	Yes	No	No	No
369	No	51	No	No	No	No	Yes	No	No	Yes	Never	3 or 4 times a week	Daily	Daily	No	No	Yes	No	No	No	No	No	No	No	No	No	Yes	No	4 to 6 hours per week	4 to 6 hours per week	No, it has remained	Athlete	Athlete	No	No	No	No	Yes	No	No	No	Yes
371	Yes	53	No	No	No	No	Yes	No	Yes	No	Once or several times a month	Daily	Never	Daily	No	No	Yes	No	No	No	No	No	No	No	No	No	Yes	No	4 to 6 hours per week	4 to 6 hours per week	No, it has remained	Athlete	Athlete	No	No	No	No	Yes	No	No	Yes	No
372	Yes	50	No	No	No	No	Yes	No	No	Yes	1 or 2 times a week	Once or several times a month	1 or 2 times a week	Daily	No	Yes	No	No	No	No	No	No	No	No	No	No	Yes	No	More than 8 hours a week	More than 8 hours a week	No, it has remained	Athlete	Athlete	No	No	No	No	Yes	Yes	No	No	No
373	No	64	No	No	No	No	Yes	No	No	Yes	Never	Once or several times a month	Daily	Daily	No	No	Yes	No	No	No	No	No	No	Yes	No	No	No	No	More than 8 hours a week	More than 8 hours a week	No, it has remained	Athlete	Athlete	No	No	No	No	Yes	No	No	Yes	No
374	Yes	35	No	No	No	No	Yes	No	No	Yes	Never	Once or several times a month	Never	5 or 6 times a week	No	No	Yes	No	No	No	No	No	No	No	No	Yes	No	No	6 to 8 hours per week	Less than 4 hours a week	Yes, it has worsened	Athlete	Athlete	No	No	No	No	Yes	No	No	Yes	No
375	Yes	53	No	No	No	No	Yes	Yes	No	No	Never	Once or several times a month	1 or 2 times a week	5 or 6 times a week	No	No	Yes	No	No	No	No	No	No	No	No	No	Yes	No	Less than 4 hours a week	Less than 4 hours a week	No, it has remained	Athlete	Athlete	No	Yes	No	No	No	Yes	No	No	No
376	No	60	No	No	No	No	Yes	No	No	Yes	Never	Never	Once or several times a month	Daily	No	No	Yes	No	No	No	No	No	No	No	No	No	Yes	No	I do not do sport	I do not do sport	No, it has remained	Sedentary	Sedentary	No	No	No	No	Yes	No	No	No	Yes
377	Yes	57	No	Yes	No	No	Yes	No	No	Yes	Never	Once or several times a month	Never	Daily	No	No	Yes	No	No	No	No	No	No	Yes	No	No	No	No	6 to 8 hours per week	Less than 4 hours a week	Yes, it has worsened	Athlete	Athlete	No	No	No	No	Yes	No	No	No	Yes
378	Yes	30	No	Yes	Yes	No	No	Yes	No	No	Once or several times a month	3 or 4 times a week	Once or several times a month	Daily	Yes	No	No	No	No	No	No	No	No	No	No	Yes	No	No	4 to 6 hours per week	4 to 6 hours per week	No, it has remained	Athlete	Athlete	No	No	No	No	Yes	No	No	Yes	No
379	Yes	31	No	Yes	No	No	Yes	No	No	Yes	Never	1 or 2 times a week	Once or several times a month	Daily	No	No	Yes	No	No	No	Yes	No	No	No	No	No	No	No	4 to 6 hours per week	Less than 4 hours a week	Yes, it has worsened	Athlete	Athlete	No	No	No	No	Yes	Yes	No	No	No
380	Yes	63	No	Yes	No	No	Yes	No	No	Yes	Never	Never	1 or 2 times a week	Daily	No	No	Yes	No	No	No	No	No	No	No	Yes	No	No	No	4 to 6 hours per week	4 to 6 hours per week	No, it has remained	Athlete	Athlete	No	No	No	No	Yes	No	No	Yes	No
381	No	44	No	No	No	No	Yes	No	No	Yes	Once or several times a month	1 or 2 times a week	Daily	Daily	No	No	Yes	No	No	No	No	No	No	No	No	No	Yes	No	6 to 8 hours per week	6 to 8 hours per week	No, it has remained	Athlete	Athlete	No	No	No	No	Yes	No	No	Yes	No
382	Yes	53	No	No	No	No	Yes	No	No	Yes	Never	3 or 4 times a week	Never	Daily	Yes	No	No	No	No	No	No	No	No	No	Yes	No	No	No	Less than 4 hours a week	Less than 4 hours a week	No, it has remained	Athlete	Athlete	No	No	No	No	Yes	Yes	No	No	No
383	Yes	34	No	No	No	Yes	No	No	No	Yes	Once or several times a month	1 or 2 times a week	1 or 2 times a week	5 or 6 times a week	No	No	Yes	No	No	No	No	No	No	No	No	Yes	No	No	I do not do sport	I do not do sport	No, it has remained	Sedentary	Sedentary	No	No	No	Yes	No	Yes	No	No	No
384	Yes	32	No	Yes	No	No	Yes	No	No	Yes	Never	5 or 6 times a week	Once or several times a month	Daily	No	No	Yes	No	No	No	No	No	No	No	No	Yes	No	No	Less than 4 hours a week	Less than 4 hours a week	No, it has remained	Athlete	Athlete	No	No	No	No	Yes	Yes	No	No	No
385	Yes	33	No	Yes	No	Yes	No	Yes	No	No	Once or several times a month	3 or 4 times a week	Once or several times a month	Daily	Yes	No	No	No	No	No	No	No	No	No	No	Yes	No	No	I do not do sport	I do not do sport	No, it has remained	Sedentary	Sedentary	No	No	No	No	Yes	Yes	No	No	No
386	Yes	55	No	No	No	No	Yes	No	No	Yes	Never	1 or 2 times a week	Never	Daily	No	No	Yes	No	No	No	No	No	No	No	No	Yes	No	No	I do not do sport	I do not do sport	No, it has remained	Sedentary	Sedentary	No	No	No	No	Yes	Yes	No	No	No
387	No	68	No	No	No	No	Yes	No	Yes	No	Once or several times a month	Once or several times a month	3 or 4 times a week	Daily	No	No	Yes	No	No	No	No	No	No	No	No	No	Yes	No	6 to 8 hours per week	6 to 8 hours per week	No, it has remained	Athlete	Athlete	No	No	No	No	Yes	No	No	Yes	No
388	No	56	No	No	No	No	Yes	Yes	No	No	Never	Never	Never	Daily	Yes	No	No	No	No	No	Yes	No	No	No	No	No	No	No	6 to 8 hours per week	Less than 4 hours a week	Yes, it has worsened	Athlete	Athlete	No	No	No	No	Yes	Yes	No	No	No
390	No	24	Yes	Yes	No	Yes	No	Yes	No	No	1 or 2 times a week	1 or 2 times a week	Once or several times a month	3 or 4 times a week	Yes	No	No	No	No	No	No	No	No	No	No	No	No	Yes	4 to 6 hours per week	I do not do sport	Yes, it has worsened	Athlete	Sedentary	No	No	No	No	Yes	Yes	No	No	No
391	Yes	23	Yes	Yes	Yes	No	No	No	No	Yes	Never	Once or several times a month	Never	Daily	Yes	No	No	No	No	No	No	No	No	No	No	No	Yes	No	More than 8 hours a week	More than 8 hours a week	No, it has remained	Athlete	Athlete	No	No	No	No	Yes	No	No	Yes	No
392	No	42	No	No	No	No	Yes	No	No	Yes	Never	Daily	Never	Daily	Yes	No	No	No	No	No	No	No	No	No	No	Yes	No	No	Less than 4 hours a week	Less than 4 hours a week	No, it has remained	Athlete	Athlete	No	No	No	No	Yes	Yes	No	No	No
393	Yes	40	No	No	No	Yes	No	Yes	No	No	Once or several times a month	5 or 6 times a week	5 or 6 times a week	3 or 4 times a week	No	No	Yes	No	No	No	No	No	No	No	No	No	No	Yes	4 to 6 hours per week	Less than 4 hours a week	Yes, it has worsened	Athlete	Athlete	Yes	No	No	No	No	No	No	Yes	No
394	Yes	56	No	No	No	No	Yes	No	Yes	No	Once or several times a month	Once or several times a month	Once or several times a month	Daily	Yes	No	No	No	No	No	No	No	No	No	No	Yes	No	No	4 to 6 hours per week	6 to 8 hours per week	Yes, it has improved	Athlete	Athlete	No	No	No	No	Yes	Yes	No	No	No
395	Yes	32	No	Yes	No	No	Yes	No	No	Yes	Never	Once or several times a month	1 or 2 times a week	5 or 6 times a week	No	No	Yes	No	No	No	No	No	No	No	Yes	No	No	No	I do not do sport	4 to 6 hours per week	Yes, it has improved	Sedentary	Athlete	No	No	No	No	Yes	No	No	Yes	No
396	Yes	48	No	No	No	No	Yes	No	No	Yes	Never	3 or 4 times a week	1 or 2 times a week	5 or 6 times a week	No	No	Yes	No	No	No	No	No	No	No	No	No	No	Yes	Less than 4 hours a week	I do not do sport	Yes, it has worsened	Athlete	Sedentary	No	No	No	No	Yes	No	No	Yes	No
397	Yes	52	No	No	No	No	Yes	No	No	Yes	Once or several times a month	1 or 2 times a week	1 or 2 times a week	Daily	No	No	Yes	No	No	No	No	No	No	No	Yes	No	No	No	Less than 4 hours a week	Less than 4 hours a week	No, it has remained	Athlete	Athlete	No	No	No	No	Yes	No	No	Yes	No
399	Yes	48	No	No	No	No	Yes	No	No	Yes	Once or several times a month	3 or 4 times a week	Once or several times a month	Daily	No	No	Yes	No	No	No	No	No	No	No	No	No	Yes	No	Less than 4 hours a week	Less than 4 hours a week	No, it has remained	Athlete	Athlete	No	No	No	No	Yes	No	No	Yes	No
401	Yes	47	No	No	No	No	Yes	No	No	Yes	Never	3 or 4 times a week	1 or 2 times a week	Daily	No	No	Yes	No	No	No	No	No	No	No	No	No	Yes	No	More than 8 hours a week	More than 8 hours a week	No, it has remained	Athlete	Athlete	No	No	No	No	Yes	Yes	No	No	No
402	Yes	53	No	Yes	Yes	No	No	No	No	Yes	Never	Once or several times a month	Never	Daily	No	No	Yes	No	No	No	No	No	No	Yes	No	No	No	No	More than 8 hours a week	4 to 6 hours per week	Yes, it has worsened	Athlete	Athlete	No	No	No	No	Yes	Yes	No	No	No
404	No	62	No	No	No	Yes	No	Yes	No	No	Never	3 or 4 times a week	Never	1 or 2 times a week	Yes	No	No	No	No	No	No	No	No	No	No	Yes	No	No	4 to 6 hours per week	Less than 4 hours a week	Yes, it has worsened	Athlete	Athlete	No	No	No	No	Yes	No	No	No	Yes
405	No	24	No	Yes	No	No	Yes	No	No	Yes	Once or several times a month	Once or several times a month	1 or 2 times a week	5 or 6 times a week	Yes	No	No	No	Yes	No	No	No	No	No	No	No	No	No	Less than 4 hours a week	4 to 6 hours per week	Yes, it has improved	Athlete	Athlete	No	No	No	No	Yes	Yes	No	No	No
406	No	20	Yes	Yes	Yes	No	No	No	No	Yes	Once or several times a month	Once or several times a month	Never	3 or 4 times a week	No	No	Yes	No	No	No	No	No	No	No	No	Yes	No	No	Less than 4 hours a week	Less than 4 hours a week	No, it has remained	Athlete	Athlete	No	No	No	No	Yes	Yes	No	No	No
408	No	43	No	Yes	Yes	No	No	No	No	Yes	Once or several times a month	1 or 2 times a week	Once or several times a month	Daily	No	Yes	No	No	No	No	No	No	No	No	Yes	No	No	No	4 to 6 hours per week	6 to 8 hours per week	Yes, it has improved	Athlete	Athlete	No	No	No	No	Yes	Yes	No	No	No
410	Yes	57	No	No	No	Yes	No	Yes	No	No	Never	1 or 2 times a week	1 or 2 times a week	Daily	Yes	No	No	No	No	No	No	No	No	No	No	No	Yes	No	4 to 6 hours per week	4 to 6 hours per week	No, it has remained	Athlete	Athlete	No	No	No	No	Yes	Yes	No	No	No
411	Yes	18	Yes	Yes	No	No	Yes	No	Yes	No	Once or several times a month	Daily	Never	Daily	Yes	No	No	No	No	Yes	No	No	No	No	No	No	No	No	I do not do sport	4 to 6 hours per week	Yes, it has improved	Sedentary	Athlete	No	No	No	No	Yes	Yes	No	No	No
412	Yes	44	No	No	No	No	Yes	Yes	No	No	Never	3 or 4 times a week	Once or several times a month	Daily	No	Yes	No	No	No	No	No	No	No	No	Yes	No	No	No	I do not do sport	I do not do sport	No, it has remained	Sedentary	Sedentary	No	No	No	No	Yes	No	No	Yes	No
413	No	41	No	No	No	No	Yes	No	Yes	No	Never	1 or 2 times a week	5 or 6 times a week	Daily	No	Yes	No	No	No	No	No	No	No	No	No	No	Yes	No	4 to 6 hours per week	I do not do sport	Yes, it has worsened	Athlete	Sedentary	No	No	No	No	Yes	No	No	Yes	No
414	Yes	35	No	Yes	No	No	Yes	No	No	Yes	Never	Never	Once or several times a month	Daily	Yes	No	No	No	No	No	No	No	No	No	No	No	Yes	No	4 to 6 hours per week	Less than 4 hours a week	Yes, it has worsened	Athlete	Athlete	No	No	No	No	Yes	Yes	No	No	No
415	No	39	No	No	No	No	Yes	No	No	Yes	Once or several times a month	1 or 2 times a week	Once or several times a month	Daily	No	No	Yes	No	No	No	No	No	No	No	Yes	No	No	No	4 to 6 hours per week	4 to 6 hours per week	No, it has remained	Athlete	Athlete	No	No	No	No	Yes	Yes	No	No	No
416	Yes	52	No	No	No	No	Yes	No	No	Yes	Never	1 or 2 times a week	Never	Daily	No	Yes	No	No	No	No	No	No	No	No	No	No	Yes	No	Less than 4 hours a week	Less than 4 hours a week	No, it has remained	Athlete	Athlete	No	No	No	No	Yes	Yes	No	No	No
417	No	40	No	No	No	No	Yes	No	No	Yes	Never	1 or 2 times a week	1 or 2 times a week	Daily	No	No	Yes	No	No	No	No	No	No	No	No	No	Yes	No	Less than 4 hours a week	Less than 4 hours a week	No, it has remained	Athlete	Athlete	No	No	No	No	Yes	Yes	No	No	No
418	Yes	37	No	Yes	No	No	Yes	No	No	Yes	Never	Once or several times a month	Once or several times a month	Daily	No	No	Yes	No	No	No	No	No	No	No	No	Yes	No	No	Less than 4 hours a week	Less than 4 hours a week	No, it has remained	Athlete	Athlete	No	No	No	No	Yes	No	No	Yes	No
419	Yes	20	Yes	Yes	Yes	No	No	No	No	Yes	Never	Once or several times a month	Once or several times a month	5 or 6 times a week	No	Yes	No	No	No	No	No	No	No	Yes	No	No	No	No	6 to 8 hours per week	6 to 8 hours per week	No, it has remained	Athlete	Athlete	No	No	No	No	Yes	No	No	Yes	No
420	Yes	58	No	Yes	No	No	Yes	No	No	Yes	Never	Never	Never	Daily	No	No	Yes	No	No	No	No	No	Yes	No	No	No	No	No	6 to 8 hours per week	6 to 8 hours per week	No, it has remained	Athlete	Athlete	No	No	No	No	Yes	Yes	No	No	No
421	Yes	45	No	Yes	Yes	No	No	No	Yes	No	Never	1 or 2 times a week	Never	Daily	No	Yes	No	No	No	No	Yes	No	No	No	No	No	No	No	Less than 4 hours a week	4 to 6 hours per week	Yes, it has improved	Athlete	Athlete	No	No	No	No	Yes	No	No	Yes	No
422	Yes	18	Yes	Yes	No	No	Yes	Yes	No	No	Daily	1 or 2 times a week	Once or several times a month	Daily	Yes	No	No	No	No	No	No	No	No	No	No	No	No	Yes	I do not do sport	I do not do sport	No, it has remained	Sedentary	Sedentary	No	No	No	No	Yes	Yes	No	No	No
423	Yes	50	No	Yes	No	No	Yes	Yes	No	No	1 or 2 times a week	3 or 4 times a week	3 or 4 times a week	1 or 2 times a week	No	No	Yes	No	No	No	No	Yes	No	No	No	No	No	No	Less than 4 hours a week	Less than 4 hours a week	No, it has remained	Athlete	Athlete	No	No	Yes	No	No	Yes	No	No	No
424	Yes	33	No	Yes	Yes	No	No	No	Yes	No	Daily	Daily	Never	5 or 6 times a week	No	No	Yes	No	No	No	No	No	No	No	No	Yes	No	No	Less than 4 hours a week	More than 8 hours a week	Yes, it has improved	Athlete	Athlete	No	No	No	No	Yes	No	No	Yes	No
425	Yes	62	No	No	No	No	Yes	Yes	No	No	Never	Once or several times a month	Once or several times a month	Daily	No	No	Yes	No	No	No	No	No	Yes	No	No	No	No	No	More than 8 hours a week	4 to 6 hours per week	Yes, it has worsened	Athlete	Athlete	No	No	No	No	Yes	Yes	No	No	No
426	No	41	No	No	No	No	Yes	No	No	Yes	Never	Once or several times a month	3 or 4 times a week	Daily	Yes	No	No	No	No	No	No	No	No	No	No	Yes	No	No	4 to 6 hours per week	Less than 4 hours a week	Yes, it has worsened	Athlete	Athlete	No	No	No	No	Yes	No	No	Yes	No
427	Yes	34	No	No	No	No	Yes	No	No	Yes	Never	Once or several times a month	Never	Daily	No	No	Yes	No	No	No	No	No	No	No	No	Yes	No	No	I do not do sport	Less than 4 hours a week	Yes, it has improved	Sedentary	Athlete	No	No	No	No	Yes	No	Yes	No	No
428	Yes	26	No	Yes	Yes	No	No	No	No	Yes	Never	Never	Once or several times a month	5 or 6 times a week	No	No	Yes	No	No	Yes	No	No	No	No	No	No	No	No	I do not do sport	Less than 4 hours a week	Yes, it has improved	Sedentary	Athlete	No	No	No	No	Yes	Yes	No	No	No
430	Yes	55	No	No	No	No	Yes	No	No	Yes	Never	Once or several times a month	Once or several times a month	Daily	No	No	Yes	No	No	No	No	No	No	No	No	Yes	No	No	Less than 4 hours a week	Less than 4 hours a week	No, it has remained	Athlete	Athlete	No	No	No	No	Yes	Yes	No	No	No
431	Yes	58	No	No	No	No	Yes	No	No	Yes	Never	3 or 4 times a week	Never	Daily	No	No	Yes	No	No	No	No	No	No	No	Yes	No	No	No	4 to 6 hours per week	4 to 6 hours per week	No, it has remained	Athlete	Athlete	No	No	No	No	Yes	No	No	Yes	No
432	No	25	No	Yes	No	No	Yes	No	No	Yes	Never	Once or several times a month	Once or several times a month	5 or 6 times a week	Yes	No	No	No	No	No	No	No	No	No	No	Yes	No	No	More than 8 hours a week	6 to 8 hours per week	Yes, it has worsened	Athlete	Athlete	No	No	No	No	Yes	No	No	Yes	No
433	Yes	44	No	No	No	No	Yes	No	No	Yes	1 or 2 times a week	5 or 6 times a week	1 or 2 times a week	Daily	No	No	Yes	No	No	No	No	No	Yes	No	No	No	No	No	Less than 4 hours a week	Less than 4 hours a week	No, it has remained	Athlete	Athlete	No	No	No	No	Yes	Yes	No	No	No
434	Yes	50	No	No	No	No	Yes	No	No	Yes	Once or several times a month	1 or 2 times a week	Never	Daily	No	No	Yes	No	No	No	No	No	No	No	No	Yes	No	No	I do not do sport	I do not do sport	No, it has remained	Sedentary	Sedentary	No	No	No	No	Yes	No	No	Yes	No
435	Yes	21	Yes	Yes	No	No	Yes	No	Yes	No	Once or several times a month	1 or 2 times a week	Once or several times a month	3 or 4 times a week	No	No	Yes	No	No	No	No	No	No	No	No	No	Yes	No	I do not do sport	Less than 4 hours a week	Yes, it has improved	Sedentary	Athlete	No	No	No	No	Yes	Yes	No	No	No
436	Yes	59	No	No	No	No	Yes	No	Yes	No	Never	3 or 4 times a week	Never	Daily	No	No	Yes	No	No	No	No	No	No	No	No	No	No	Yes	4 to 6 hours per week	4 to 6 hours per week	No, it has remained	Athlete	Athlete	No	No	No	No	Yes	No	No	Yes	No
437	No	41	No	No	No	No	Yes	No	No	Yes	Never	3 or 4 times a week	1 or 2 times a week	Daily	No	No	Yes	No	No	No	No	No	No	No	No	Yes	No	No	4 to 6 hours per week	Less than 4 hours a week	Yes, it has worsened	Athlete	Athlete	No	No	No	No	Yes	No	No	Yes	No
438	Yes	42	No	Yes	No	No	Yes	No	No	Yes	Never	Never	Never	Daily	Yes	No	No	No	No	No	No	No	No	No	No	No	Yes	No	I do not do sport	I do not do sport	No, it has remained	Sedentary	Sedentary	No	No	No	No	Yes	Yes	No	No	No
439	No	22	Yes	Yes	No	Yes	No	Yes	No	No	Never	Daily	Never	1 or 2 times a week	No	Yes	No	No	No	Yes	No	No	No	No	No	No	No	No	More than 8 hours a week	Less than 4 hours a week	Yes, it has worsened	Athlete	Athlete	No	No	No	No	Yes	No	No	Yes	No
440	Yes	45	No	No	No	No	Yes	No	No	Yes	Never	Once or several times a month	Once or several times a month	Daily	No	No	Yes	No	No	No	No	No	Yes	No	No	No	No	No	I do not do sport	I do not do sport	No, it has remained	Sedentary	Sedentary	No	No	No	No	Yes	Yes	No	No	No
442	No	49	No	No	No	No	Yes	No	No	Yes	Once or several times a month	1 or 2 times a week	3 or 4 times a week	Daily	No	No	Yes	No	No	No	Yes	No	No	No	No	No	No	No	Less than 4 hours a week	Less than 4 hours a week	No, it has remained	Athlete	Athlete	No	No	No	No	Yes	Yes	No	No	No
443	Yes	66	No	No	No	No	Yes	Yes	No	No	Once or several times a month	5 or 6 times a week	5 or 6 times a week	Daily	No	No	Yes	No	No	No	No	No	No	No	No	No	Yes	No	4 to 6 hours per week	Less than 4 hours a week	Yes, it has worsened	Athlete	Athlete	No	No	No	No	Yes	No	No	Yes	No
444	No	32	No	Yes	No	No	Yes	No	Yes	No	Never	1 or 2 times a week	1 or 2 times a week	5 or 6 times a week	Yes	No	No	No	No	No	No	No	No	Yes	No	No	No	No	6 to 8 hours per week	Less than 4 hours a week	Yes, it has worsened	Athlete	Athlete	No	No	No	No	Yes	No	No	Yes	No
445	Yes	46	No	No	No	No	Yes	No	No	Yes	Once or several times a month	Daily	1 or 2 times a week	3 or 4 times a week	Yes	No	No	No	No	No	No	No	No	No	No	No	Yes	No	Less than 4 hours a week	I do not do sport	Yes, it has worsened	Athlete	Sedentary	No	No	No	No	Yes	No	No	Yes	No
446	Yes	20	Yes	Yes	Yes	No	No	No	Yes	No	Never	Never	Never	Daily	Yes	No	No	No	Yes	No	No	No	No	No	No	No	No	No	6 to 8 hours per week	6 to 8 hours per week	No, it has remained	Athlete	Athlete	No	No	No	No	Yes	No	No	Yes	No
447	Yes	41	Yes	No	No	No	Yes	No	No	Yes	Never	1 or 2 times a week	Never	Daily	No	Yes	No	No	No	No	No	No	No	Yes	No	No	No	No	Less than 4 hours a week	I do not do sport	Yes, it has worsened	Athlete	Sedentary	No	No	No	No	Yes	Yes	No	No	No
448	No	50	No	No	No	No	Yes	No	No	Yes	Once or several times a month	1 or 2 times a week	1 or 2 times a week	Daily	Yes	No	No	No	No	No	No	No	No	No	No	No	Yes	No	More than 8 hours a week	6 to 8 hours per week	Yes, it has worsened	Athlete	Athlete	No	No	No	No	Yes	No	No	Yes	No
449	Yes	20	Yes	Yes	No	No	Yes	Yes	No	No	Once or several times a month	Daily	Once or several times a month	1 or 2 times a week	No	No	Yes	No	No	No	No	No	No	No	No	No	No	Yes	4 to 6 hours per week	Less than 4 hours a week	Yes, it has worsened	Athlete	Athlete	No	No	No	No	Yes	No	No	Yes	No
450	Yes	46	No	No	No	No	Yes	No	No	Yes	Never	1 or 2 times a week	1 or 2 times a week	Daily	Yes	No	No	No	No	No	No	No	No	No	No	Yes	No	No	4 to 6 hours per week	Less than 4 hours a week	Yes, it has worsened	Athlete	Athlete	No	No	No	No	Yes	No	No	Yes	No
451	No	56	No	No	No	No	Yes	No	No	Yes	Never	Daily	Daily	Daily	No	No	Yes	No	No	No	Yes	No	No	No	No	No	No	No	I do not do sport	I do not do sport	No, it has remained	Sedentary	Sedentary	No	No	No	Yes	No	No	No	Yes	No
452	Yes	21	Yes	Yes	No	Yes	No	Yes	No	No	Once or several times a month	1 or 2 times a week	Once or several times a month	Daily	No	Yes	No	No	No	Yes	No	No	No	No	No	No	No	No	More than 8 hours a week	Less than 4 hours a week	Yes, it has worsened	Athlete	Athlete	No	No	No	No	Yes	Yes	No	No	No
453	Yes	64	No	No	No	No	Yes	Yes	No	No	Never	Once or several times a month	Once or several times a month	Daily	No	Yes	No	No	No	No	No	No	No	No	No	Yes	No	No	4 to 6 hours per week	Less than 4 hours a week	Yes, it has worsened	Athlete	Athlete	Yes	No	No	No	No	Yes	No	No	No
454	Yes	24	No	Yes	Yes	No	No	Yes	No	No	Never	1 or 2 times a week	1 or 2 times a week	Daily	Yes	No	No	No	No	Yes	No	No	No	No	No	No	No	No	4 to 6 hours per week	Less than 4 hours a week	Yes, it has worsened	Athlete	Athlete	No	No	No	No	Yes	Yes	No	No	No
455	Yes	28	No	Yes	Yes	No	No	No	Yes	No	Never	1 or 2 times a week	Once or several times a month	Daily	Yes	No	No	No	No	No	No	No	No	No	No	Yes	No	No	Less than 4 hours a week	6 to 8 hours per week	Yes, it has improved	Athlete	Athlete	No	No	No	No	Yes	Yes	No	No	No
456	No	43	No	No	No	No	Yes	No	Yes	No	Never	1 or 2 times a week	Once or several times a month	Daily	No	No	Yes	No	No	No	No	No	No	No	No	No	Yes	No	4 to 6 hours per week	4 to 6 hours per week	No, it has remained	Athlete	Athlete	No	No	No	No	Yes	No	No	Yes	No
457	Yes	26	Yes	Yes	No	Yes	No	Yes	No	No	Never	3 or 4 times a week	Once or several times a month	Daily	Yes	No	No	Yes	No	No	No	No	No	No	No	No	No	No	4 to 6 hours per week	I do not do sport	Yes, it has worsened	Athlete	Sedentary	No	No	No	No	Yes	Yes	No	No	No
458	Yes	36	No	No	Yes	No	No	No	Yes	No	Never	Once or several times a month	Never	Daily	Yes	No	No	No	No	No	No	No	No	No	No	Yes	No	No	4 to 6 hours per week	4 to 6 hours per week	No, it has remained	Athlete	Athlete	No	No	No	No	Yes	No	No	Yes	No
459	Yes	36	No	No	No	No	Yes	No	No	Yes	Never	1 or 2 times a week	Never	3 or 4 times a week	No	Yes	No	No	No	No	No	No	No	No	Yes	No	No	No	I do not do sport	I do not do sport	No, it has remained	Sedentary	Sedentary	No	No	No	No	Yes	Yes	No	No	No
460	No	22	Yes	Yes	Yes	No	No	Yes	No	No	Never	Never	Never	Daily	No	Yes	No	No	No	No	No	No	No	No	No	Yes	No	No	More than 8 hours a week	More than 8 hours a week	No, it has remained	Athlete	Athlete	No	No	No	No	Yes	No	Yes	No	No
461	No	24	Yes	Yes	Yes	No	No	Yes	No	No	1 or 2 times a week	3 or 4 times a week	1 or 2 times a week	Daily	No	No	Yes	No	No	No	No	No	No	No	No	No	No	Yes	I do not do sport	4 to 6 hours per week	Yes, it has improved	Sedentary	Athlete	No	No	No	No	Yes	Yes	No	No	No
462	No	44	No	No	Yes	No	No	Yes	No	No	1 or 2 times a week	Daily	Never	Daily	No	Yes	No	No	No	No	No	No	No	No	Yes	No	No	No	6 to 8 hours per week	Less than 4 hours a week	Yes, it has worsened	Athlete	Athlete	No	No	No	No	Yes	Yes	No	No	No
464	No	70	No	No	Yes	No	No	No	No	Yes	Never	Daily	Never	Daily	No	Yes	No	No	No	No	No	No	No	No	Yes	No	No	No	4 to 6 hours per week	Less than 4 hours a week	Yes, it has worsened	Athlete	Athlete	No	No	No	No	Yes	Yes	No	No	No
465	Yes	31	No	Yes	No	No	Yes	No	No	Yes	Once or several times a month	Once or several times a month	1 or 2 times a week	3 or 4 times a week	No	No	Yes	No	No	No	No	No	No	No	No	Yes	No	No	Less than 4 hours a week	4 to 6 hours per week	Yes, it has improved	Athlete	Athlete	No	No	No	No	Yes	No	No	Yes	No
466	Yes	35	No	No	No	No	Yes	No	No	Yes	Never	1 or 2 times a week	1 or 2 times a week	Daily	No	No	Yes	No	No	No	No	No	No	No	No	No	Yes	No	I do not do sport	Less than 4 hours a week	Yes, it has improved	Sedentary	Athlete	No	No	No	No	Yes	Yes	No	No	No
468	Yes	42	No	No	No	Yes	No	Yes	No	No	Never	Never	Daily	Daily	No	No	Yes	No	No	No	No	No	No	No	No	No	Yes	No	More than 8 hours a week	4 to 6 hours per week	Yes, it has worsened	Athlete	Athlete	No	No	No	No	Yes	Yes	No	No	No
469	Yes	38	Yes	Yes	No	Yes	No	Yes	No	No	Once or several times a month	5 or 6 times a week	Never	Daily	Yes	No	No	No	Yes	No	No	No	No	No	No	No	No	No	I do not do sport	I do not do sport	No, it has remained	Sedentary	Sedentary	No	No	No	No	Yes	No	No	Yes	No
470	Yes	26 años	Yes	Yes	No	Yes	No	Yes	No	No	Never	1 or 2 times a week	1 or 2 times a week	Daily	No	Yes	No	No	No	No	No	No	No	No	No	No	No	Yes	I do not do sport	Less than 4 hours a week	Yes, it has improved	Sedentary	Athlete	No	No	No	No	Yes	Yes	No	No	No
471	No	56	No	No	No	No	Yes	No	No	Yes	Never	Once or several times a month	Once or several times a month	Daily	No	No	Yes	No	No	No	No	No	No	No	Yes	No	No	No	More than 8 hours a week	More than 8 hours a week	No, it has remained	Athlete	Athlete	No	No	No	No	Yes	No	No	Yes	No
472	Yes	20	Yes	Yes	No	No	Yes	No	Yes	No	Never	3 or 4 times a week	Never	5 or 6 times a week	Yes	No	No	No	No	No	No	No	No	No	No	No	No	Yes	I do not do sport	I do not do sport	No, it has remained	Sedentary	Sedentary	No	No	No	No	Yes	Yes	No	No	No
476	Yes	20	Yes	Yes	Yes	No	No	No	No	Yes	Once or several times a month	1 or 2 times a week	Once or several times a month	Daily	No	No	Yes	No	No	No	Yes	No	No	No	No	No	No	No	Less than 4 hours a week	4 to 6 hours per week	Yes, it has improved	Athlete	Athlete	No	No	No	No	Yes	Yes	No	No	No
477	No	44	No	No	Yes	No	No	No	No	Yes	Never	1 or 2 times a week	Daily	Daily	No	No	Yes	No	No	No	No	No	No	No	No	No	Yes	No	I do not do sport	I do not do sport	No, it has remained	Sedentary	Sedentary	No	No	No	No	Yes	No	No	Yes	No
478	Yes	64	No	No	No	Yes	No	Yes	No	No	Never	5 or 6 times a week	3 or 4 times a week	Daily	Yes	No	No	No	No	No	No	No	No	No	Yes	No	No	No	4 to 6 hours per week	I do not do sport	Yes, it has worsened	Athlete	Sedentary	No	No	No	No	Yes	Yes	No	No	No
480	Yes	51	No	No	No	No	Yes	No	No	Yes	Once or several times a month	Daily	Once or several times a month	Daily	No	No	Yes	No	No	No	No	No	No	No	No	No	Yes	No	Less than 4 hours a week	I do not do sport	Yes, it has worsened	Athlete	Sedentary	No	No	No	No	Yes	No	No	Yes	No
481	No	46	No	No	No	No	Yes	No	No	Yes	Never	Once or several times a month	Once or several times a month	Daily	No	No	Yes	No	No	No	No	No	No	No	No	No	Yes	No	4 to 6 hours per week	4 to 6 hours per week	No, it has remained	Athlete	Athlete	No	No	No	No	Yes	No	No	Yes	No
482	Yes	21	Yes	Yes	No	Yes	No	Yes	No	No	Never	Daily	Never	Daily	No	Yes	No	No	No	No	Yes	No	No	No	No	No	No	No	4 to 6 hours per week	Less than 4 hours a week	Yes, it has worsened	Athlete	Athlete	No	No	No	No	Yes	Yes	No	No	No
483	Yes	29	No	No	No	Yes	No	Yes	No	No	Never	3 or 4 times a week	Once or several times a month	Daily	Yes	No	No	No	No	No	No	No	No	No	No	No	Yes	No	Less than 4 hours a week	I do not do sport	Yes, it has worsened	Athlete	Sedentary	No	No	No	No	Yes	No	No	Yes	No
484	Yes	34	No	No	No	No	Yes	No	No	Yes	3 or 4 times a week	Once or several times a month	1 or 2 times a week	5 or 6 times a week	No	No	Yes	No	No	No	No	No	No	No	No	Yes	No	No	I do not do sport	I do not do sport	No, it has remained	Sedentary	Sedentary	No	No	Yes	No	No	Yes	No	No	No
485	Yes	27	No	Yes	No	No	Yes	No	Yes	No	Never	Once or several times a month	1 or 2 times a week	Daily	No	No	Yes	No	No	No	No	Yes	No	No	No	No	No	No	I do not do sport	4 to 6 hours per week	Yes, it has improved	Sedentary	Athlete	No	No	No	No	Yes	Yes	No	No	No
486	Yes	18	Yes	Yes	No	No	Yes	No	No	Yes	3 or 4 times a week	Once or several times a month	Never	Daily	Yes	No	No	No	No	No	No	No	No	No	No	No	No	Yes	I do not do sport	I do not do sport	No, it has remained	Sedentary	Sedentary	No	No	No	No	Yes	Yes	No	No	No
487	Yes	sesenta y cinco.	No	Yes	No	No	Yes	No	No	Yes	Never	Once or several times a month	3 or 4 times a week	Daily	No	No	Yes	No	No	No	No	No	No	No	Yes	No	No	No	4 to 6 hours per week	4 to 6 hours per week	No, it has remained	Athlete	Athlete	No	No	No	No	Yes	No	No	Yes	No
488	Yes	36	Yes	Yes	Yes	No	No	No	No	Yes	Once or several times a month	1 or 2 times a week	1 or 2 times a week	Daily	No	No	Yes	No	No	No	No	No	No	No	No	No	No	Yes	I do not do sport	I do not do sport	No, it has remained	Sedentary	Sedentary	No	No	No	No	Yes	Yes	No	No	No
489	No	38	No	Yes	Yes	No	No	No	Yes	No	Never	Once or several times a month	1 or 2 times a week	Daily	Yes	No	No	No	No	No	No	No	No	No	No	No	Yes	No	6 to 8 hours per week	More than 8 hours a week	Yes, it has improved	Athlete	Athlete	No	No	No	No	Yes	Yes	No	No	No
491	Yes	60	No	No	No	No	Yes	Yes	No	No	Never	3 or 4 times a week	1 or 2 times a week	Daily	No	Yes	No	No	No	No	No	No	No	Yes	No	No	No	No	4 to 6 hours per week	4 to 6 hours per week	No, it has remained	Athlete	Athlete	No	No	No	No	Yes	Yes	No	No	No
492	No	56	No	Yes	No	No	Yes	No	Yes	No	Never	Once or several times a month	1 or 2 times a week	Daily	No	Yes	No	No	No	No	No	No	No	No	No	Yes	No	No	4 to 6 hours per week	6 to 8 hours per week	Yes, it has improved	Athlete	Athlete	No	No	No	No	Yes	No	No	Yes	No
493	Yes	74	No	Yes	No	No	Yes	No	No	Yes	Never	3 or 4 times a week	Never	Daily	No	Yes	No	No	No	No	Yes	No	No	No	No	No	No	No	I do not do sport	4 to 6 hours per week	Yes, it has improved	Sedentary	Athlete	No	No	No	No	Yes	Yes	No	No	No
494	Yes	34	No	No	No	No	Yes	No	No	Yes	Never	5 or 6 times a week	Never	Daily	Yes	No	No	No	No	No	No	No	No	No	No	Yes	No	No	4 to 6 hours per week	Less than 4 hours a week	Yes, it has worsened	Athlete	Athlete	No	No	No	No	Yes	No	No	Yes	No
496	Yes	21	Yes	Yes	No	No	Yes	Yes	No	No	Never	3 or 4 times a week	Once or several times a month	Daily	Yes	No	No	No	No	No	No	No	No	No	Yes	No	No	No	Less than 4 hours a week	Less than 4 hours a week	No, it has remained	Athlete	Athlete	No	No	No	No	Yes	Yes	No	No	No
497	Yes	34	No	Yes	No	No	Yes	No	No	Yes	Never	Never	Once or several times a month	Never	Yes	No	No	No	No	No	No	No	No	No	No	Yes	No	No	Less than 4 hours a week	6 to 8 hours per week	Yes, it has improved	Athlete	Athlete	No	No	No	No	Yes	No	No	No	Yes
498	No	18	Yes	Yes	Yes	No	No	No	Yes	No	1 or 2 times a week	Once or several times a month	Once or several times a month	3 or 4 times a week	No	Yes	No	No	Yes	No	No	No	No	No	No	No	No	No	Less than 4 hours a week	4 to 6 hours per week	Yes, it has improved	Athlete	Athlete	No	No	No	No	Yes	Yes	No	No	No
500	Yes	47	No	No	No	No	Yes	No	No	Yes	Never	Once or several times a month	Once or several times a month	Daily	Yes	No	No	No	No	No	No	No	No	No	No	No	No	Yes	6 to 8 hours per week	4 to 6 hours per week	Yes, it has worsened	Athlete	Athlete	No	No	No	No	Yes	Yes	No	No	No
501	Yes	64	No	No	Yes	No	No	No	Yes	No	Never	1 or 2 times a week	1 or 2 times a week	3 or 4 times a week	Yes	No	No	No	No	No	No	No	No	No	No	Yes	No	No	I do not do sport	I do not do sport	No, it has remained	Sedentary	Sedentary	No	No	No	No	Yes	Yes	No	No	No
503	Yes	23	Yes	Yes	No	Yes	No	Yes	No	No	Once or several times a month	5 or 6 times a week	Once or several times a month	Daily	No	Yes	No	No	No	No	No	No	No	No	No	No	No	Yes	4 to 6 hours per week	Less than 4 hours a week	Yes, it has worsened	Athlete	Athlete	No	No	No	No	Yes	Yes	No	No	No
504	Yes	19	Yes	Yes	No	No	Yes	Yes	No	No	Never	Once or several times a month	Never	Daily	No	No	Yes	No	No	No	No	No	No	No	No	No	Yes	No	Less than 4 hours a week	4 to 6 hours per week	Yes, it has improved	Athlete	Athlete	No	No	No	No	Yes	Yes	No	No	No
505	Yes	22	Yes	Yes	No	No	Yes	No	Yes	No	Never	Never	Once or several times a month	Daily	Yes	No	No	Yes	No	No	No	No	No	No	No	No	No	No	I do not do sport	I do not do sport	No, it has remained	Sedentary	Sedentary	No	No	No	No	Yes	Yes	No	No	No
506	Yes	21	Yes	Yes	No	No	Yes	No	No	Yes	Once or several times a month	1 or 2 times a week	Once or several times a month	5 or 6 times a week	Yes	No	No	No	No	No	No	No	No	No	No	No	No	Yes	I do not do sport	I do not do sport	No, it has remained	Sedentary	Sedentary	No	No	No	No	Yes	Yes	No	No	No
509	Yes	41	No	No	No	Yes	No	No	Yes	No	Once or several times a month	3 or 4 times a week	1 or 2 times a week	3 or 4 times a week	Yes	No	No	No	No	No	No	No	No	No	No	No	Yes	No	Less than 4 hours a week	Less than 4 hours a week	No, it has remained	Athlete	Athlete	No	No	No	No	Yes	Yes	No	No	No
510	Yes	25	Yes	No	No	No	Yes	No	No	Yes	Never	5 or 6 times a week	3 or 4 times a week	5 or 6 times a week	No	Yes	No	No	No	No	No	No	No	No	Yes	No	No	No	I do not do sport	Less than 4 hours a week	Yes, it has improved	Sedentary	Athlete	No	No	No	Yes	No	Yes	No	No	No
511	No	22	Yes	Yes	No	No	Yes	No	No	Yes	Never	1 or 2 times a week	Never	1 or 2 times a week	No	No	Yes	No	No	No	No	Yes	No	No	No	No	No	No	4 to 6 hours per week	4 to 6 hours per week	No, it has remained	Athlete	Athlete	No	No	No	No	Yes	No	No	Yes	No
512	No	42	No	No	No	Yes	No	Yes	No	No	1 or 2 times a week	Daily	1 or 2 times a week	1 or 2 times a week	Yes	No	No	No	No	No	No	No	No	No	No	No	Yes	No	4 to 6 hours per week	Less than 4 hours a week	Yes, it has worsened	Athlete	Athlete	No	No	No	No	Yes	Yes	No	No	No
514	Yes	45	No	Yes	No	No	Yes	No	No	Yes	Never	3 or 4 times a week	Once or several times a month	5 or 6 times a week	No	No	Yes	No	No	No	No	No	No	Yes	No	No	No	No	I do not do sport	I do not do sport	No, it has remained	Sedentary	Sedentary	No	No	No	No	Yes	No	No	Yes	No
515	Yes	60	No	No	No	No	Yes	Yes	No	No	Never	Once or several times a month	3 or 4 times a week	Daily	No	No	Yes	No	No	No	No	No	No	No	No	No	Yes	No	4 to 6 hours per week	Less than 4 hours a week	Yes, it has worsened	Athlete	Athlete	No	No	No	No	Yes	No	No	Yes	No
516	No	21	Yes	Yes	No	No	Yes	Yes	No	No	Once or several times a month	1 or 2 times a week	1 or 2 times a week	Daily	Yes	No	No	No	No	No	No	No	No	No	No	No	No	Yes	4 to 6 hours per week	I do not do sport	Yes, it has worsened	Athlete	Sedentary	No	No	No	Yes	No	No	No	No	Yes
518	Yes	32	No	No	No	No	Yes	No	No	Yes	Once or several times a month	1 or 2 times a week	3 or 4 times a week	5 or 6 times a week	Yes	No	No	No	No	No	No	No	No	No	No	No	Yes	No	4 to 6 hours per week	4 to 6 hours per week	No, it has remained	Athlete	Athlete	No	Yes	No	No	No	Yes	No	No	No
520	Yes	39	No	No	No	No	Yes	No	No	Yes	Never	5 or 6 times a week	Never	5 or 6 times a week	No	No	Yes	No	No	No	No	No	No	No	Yes	No	No	No	4 to 6 hours per week	4 to 6 hours per week	No, it has remained	Athlete	Athlete	No	No	No	No	Yes	No	No	Yes	No
521	Yes	18	Yes	Yes	No	No	Yes	No	No	Yes	Never	5 or 6 times a week	Never	1 or 2 times a week	Yes	No	No	No	No	No	No	No	No	No	No	No	No	Yes	I do not do sport	I do not do sport	No, it has remained	Sedentary	Sedentary	No	No	No	No	Yes	Yes	No	No	No
522	No	26	No	Yes	No	Yes	No	Yes	No	No	3 or 4 times a week	Once or several times a month	1 or 2 times a week	1 or 2 times a week	No	Yes	No	No	No	No	No	No	No	Yes	No	No	No	No	6 to 8 hours per week	I do not do sport	Yes, it has worsened	Athlete	Sedentary	No	No	No	No	Yes	No	No	Yes	No
523	Yes	24	Yes	Yes	Yes	No	No	Yes	No	No	Once or several times a month	Once or several times a month	1 or 2 times a week	Once or several times a month	No	No	Yes	No	No	No	No	No	No	No	No	Yes	No	No	I do not do sport	I do not do sport	No, it has remained	Sedentary	Sedentary	No	No	Yes	No	No	No	No	Yes	No
524	Yes	39	No	No	No	No	Yes	No	No	Yes	Never	3 or 4 times a week	1 or 2 times a week	3 or 4 times a week	No	No	Yes	No	No	No	No	No	No	Yes	No	No	No	No	Less than 4 hours a week	Less than 4 hours a week	No, it has remained	Athlete	Athlete	No	No	No	No	Yes	No	No	Yes	No
525	Yes	19	Yes	Yes	No	Yes	No	Yes	No	No	Never	Once or several times a month	Never	Daily	Yes	No	No	No	No	No	No	No	No	No	No	Yes	No	No	4 to 6 hours per week	Less than 4 hours a week	Yes, it has worsened	Athlete	Athlete	No	No	No	No	Yes	Yes	No	No	No
526	Yes	24	Yes	Yes	No	Yes	No	Yes	No	No	Daily	Daily	Once or several times a month	3 or 4 times a week	Yes	No	No	No	No	No	No	No	No	No	Yes	No	No	No	Less than 4 hours a week	Less than 4 hours a week	No, it has remained	Athlete	Athlete	No	Yes	No	No	No	Yes	No	No	No
527	Yes	43	No	No	No	No	Yes	No	Yes	No	Never	3 or 4 times a week	Never	Daily	No	No	Yes	No	No	No	No	No	No	No	No	Yes	No	No	Less than 4 hours a week	Less than 4 hours a week	No, it has remained	Athlete	Athlete	No	No	No	No	Yes	Yes	No	No	No
528	Yes	60	No	No	No	No	Yes	No	No	Yes	Never	3 or 4 times a week	Never	Daily	No	Yes	No	No	No	No	No	No	No	No	Yes	No	No	No	Less than 4 hours a week	Less than 4 hours a week	No, it has remained	Athlete	Athlete	No	No	No	No	Yes	Yes	No	No	No
529	No	23	No	Yes	No	No	Yes	No	No	Yes	Never	1 or 2 times a week	Never	Daily	No	No	Yes	No	No	No	No	No	No	No	No	Yes	No	No	4 to 6 hours per week	Less than 4 hours a week	Yes, it has worsened	Athlete	Athlete	No	No	No	No	Yes	No	No	No	Yes
530	No	28	Yes	Yes	Yes	No	No	No	No	Yes	1 or 2 times a week	Once or several times a month	Never	3 or 4 times a week	No	Yes	No	No	No	No	No	No	No	No	No	No	No	Yes	I do not do sport	I do not do sport	No, it has remained	Sedentary	Sedentary	No	No	No	No	Yes	No	No	No	Yes
532	Yes	20	Yes	Yes	No	Yes	No	No	No	Yes	Once or several times a month	3 or 4 times a week	Once or several times a month	Daily	Yes	No	No	No	No	No	No	No	No	No	No	No	No	Yes	Less than 4 hours a week	I do not do sport	Yes, it has worsened	Athlete	Sedentary	No	No	No	No	Yes	No	No	Yes	No
533	Yes	25	No	Yes	No	Yes	No	Yes	No	No	Once or several times a month	Once or several times a month	Once or several times a month	3 or 4 times a week	Yes	No	No	No	No	No	Yes	No	No	No	No	No	No	No	4 to 6 hours per week	4 to 6 hours per week	No, it has remained	Athlete	Athlete	No	No	No	No	Yes	Yes	No	No	No
535	No	21	Yes	Yes	No	Yes	No	No	Yes	No	3 or 4 times a week	3 or 4 times a week	1 or 2 times a week	Daily	No	Yes	No	No	No	No	No	No	No	No	No	No	No	Yes	I do not do sport	I do not do sport	No, it has remained	Sedentary	Sedentary	No	No	No	No	Yes	Yes	No	No	No
536	Yes	32	No	Yes	No	No	Yes	Yes	No	No	1 or 2 times a week	Once or several times a month	1 or 2 times a week	5 or 6 times a week	Yes	No	No	No	No	No	No	No	No	No	Yes	No	No	No	Less than 4 hours a week	Less than 4 hours a week	No, it has remained	Athlete	Athlete	No	No	No	No	Yes	Yes	No	No	No
537	Yes	19	Yes	Yes	No	No	Yes	Yes	No	No	Daily	1 or 2 times a week	1 or 2 times a week	5 or 6 times a week	Yes	No	No	No	No	No	No	No	No	No	No	No	No	Yes	I do not do sport	I do not do sport	No, it has remained	Sedentary	Sedentary	No	No	Yes	No	No	Yes	No	No	No
538	Yes	37	No	No	No	No	Yes	No	No	Yes	Never	Once or several times a month	Once or several times a month	Daily	Yes	No	No	No	No	No	No	No	No	No	Yes	No	No	No	I do not do sport	I do not do sport	No, it has remained	Sedentary	Sedentary	No	No	No	No	Yes	Yes	No	No	No
539	No	23	Yes	Yes	No	No	Yes	No	No	Yes	Never	Once or several times a month	Never	3 or 4 times a week	Yes	No	No	No	No	No	No	No	No	No	Yes	No	No	No	4 to 6 hours per week	Less than 4 hours a week	Yes, it has worsened	Athlete	Athlete	No	No	No	No	Yes	Yes	No	No	No
540	Yes	20	Yes	Yes	Yes	No	No	Yes	No	No	Once or several times a month	1 or 2 times a week	Once or several times a month	Daily	No	No	Yes	No	No	No	No	Yes	No	No	No	No	No	No	More than 8 hours a week	6 to 8 hours per week	Yes, it has worsened	Athlete	Athlete	No	No	No	No	Yes	Yes	No	No	No
541	No	47	No	No	Yes	No	No	No	No	Yes	Once or several times a month	3 or 4 times a week	5 or 6 times a week	Daily	No	No	Yes	No	No	No	No	No	No	No	No	No	Yes	No	Less than 4 hours a week	Less than 4 hours a week	No, it has remained	Athlete	Athlete	No	No	No	No	Yes	Yes	No	No	No
542	Yes	30	No	Yes	No	Yes	No	Yes	No	No	Never	3 or 4 times a week	1 or 2 times a week	3 or 4 times a week	Yes	No	No	No	No	No	No	Yes	No	No	No	No	No	No	Less than 4 hours a week	4 to 6 hours per week	Yes, it has improved	Athlete	Athlete	No	No	No	No	Yes	No	Yes	No	No
544	Yes	19	Yes	Yes	No	Yes	No	No	Yes	No	Never	Once or several times a month	Never	Daily	Yes	No	No	No	No	No	No	No	No	No	No	No	No	Yes	More than 8 hours a week	6 to 8 hours per week	Yes, it has worsened	Athlete	Athlete	No	No	No	No	Yes	Yes	No	No	No
545	Yes	25	No	Yes	No	No	Yes	No	Yes	No	Once or several times a month	Once or several times a month	1 or 2 times a week	Daily	No	No	Yes	No	No	Yes	No	No	No	No	No	No	No	No	Less than 4 hours a week	Less than 4 hours a week	No, it has remained	Athlete	Athlete	No	No	No	No	Yes	No	No	Yes	No
546	Yes	27	Yes	No	No	Yes	No	Yes	No	No	Daily	5 or 6 times a week	Never	1 or 2 times a week	Yes	No	No	No	No	Yes	No	No	No	No	No	No	No	No	Less than 4 hours a week	I do not do sport	Yes, it has worsened	Athlete	Sedentary	No	Yes	No	No	No	Yes	No	No	No
548	No	33	No	Yes	No	No	Yes	Yes	No	No	Daily	1 or 2 times a week	Never	Never	No	No	Yes	No	No	Yes	No	No	No	No	No	No	No	No	I do not do sport	I do not do sport	No, it has remained	Sedentary	Sedentary	No	No	No	No	Yes	No	No	Yes	No
549	Yes	54	No	No	Yes	No	No	No	Yes	No	Never	Once or several times a month	Never	Daily	Yes	No	No	No	No	No	No	No	No	No	No	No	No	Yes	4 to 6 hours per week	Less than 4 hours a week	Yes, it has worsened	Athlete	Athlete	No	No	No	No	Yes	No	No	No	Yes
550	Yes	42	No	No	No	No	Yes	No	Yes	No	Never	Once or several times a month	Never	Daily	No	No	Yes	No	No	No	No	No	Yes	No	No	No	No	No	Less than 4 hours a week	I do not do sport	Yes, it has worsened	Athlete	Sedentary	No	No	No	No	Yes	Yes	No	No	No
552	No	78	No	No	No	No	Yes	No	Yes	No	Once or several times a month	Daily	1 or 2 times a week	Daily	No	Yes	No	No	No	No	No	No	No	No	Yes	No	No	No	Less than 4 hours a week	Less than 4 hours a week	No, it has remained	Athlete	Athlete	No	No	No	No	Yes	No	Yes	No	No
553	Yes	18	Yes	Yes	No	No	Yes	Yes	No	No	Once or several times a month	3 or 4 times a week	1 or 2 times a week	Once or several times a month	Yes	No	No	No	No	No	No	No	No	No	Yes	No	No	No	4 to 6 hours per week	Less than 4 hours a week	Yes, it has worsened	Athlete	Athlete	No	No	Yes	No	No	Yes	No	No	No
554	Yes	37	No	Yes	No	No	Yes	Yes	No	No	Never	1 or 2 times a week	Never	Daily	Yes	No	No	No	No	No	No	No	No	No	No	Yes	No	No	I do not do sport	I do not do sport	No, it has remained	Sedentary	Sedentary	No	No	No	No	Yes	Yes	No	No	No
555	No	22	Yes	Yes	Yes	No	No	Yes	No	No	1 or 2 times a week	1 or 2 times a week	3 or 4 times a week	3 or 4 times a week	Yes	No	No	No	No	No	No	No	No	No	No	No	No	Yes	6 to 8 hours per week	6 to 8 hours per week	No, it has remained	Athlete	Athlete	No	Yes	No	No	No	Yes	No	No	No
556	No	25	Yes	Yes	No	Yes	No	Yes	No	No	Once or several times a month	1 or 2 times a week	1 or 2 times a week	1 or 2 times a week	Yes	No	No	No	No	No	Yes	No	No	No	No	No	No	No	6 to 8 hours per week	I do not do sport	Yes, it has worsened	Athlete	Sedentary	No	No	No	No	Yes	No	No	Yes	No
557	Yes	20	Yes	No	No	Yes	No	Yes	No	No	1 or 2 times a week	Once or several times a month	Never	3 or 4 times a week	Yes	No	No	No	No	Yes	No	No	No	No	No	No	No	No	Less than 4 hours a week	4 to 6 hours per week	Yes, it has improved	Athlete	Athlete	No	No	Yes	No	No	Yes	No	No	No
558	Yes	41	Yes	No	Yes	No	No	No	No	Yes	Once or several times a month	Once or several times a month	Once or several times a month	Daily	No	No	Yes	No	No	No	No	No	No	No	No	Yes	No	No	4 to 6 hours per week	4 to 6 hours per week	No, it has remained	Athlete	Athlete	No	No	No	No	Yes	Yes	No	No	No
560	Yes	46	No	No	No	No	Yes	No	No	Yes	Never	Once or several times a month	Once or several times a month	Daily	Yes	No	No	No	No	No	No	No	No	No	No	Yes	No	No	Less than 4 hours a week	I do not do sport	Yes, it has worsened	Athlete	Sedentary	No	No	No	No	Yes	No	No	Yes	No
562	No	18	Yes	Yes	No	Yes	No	No	No	Yes	1 or 2 times a week	Daily	Never	Daily	No	Yes	No	No	No	Yes	No	No	No	No	No	No	No	No	4 to 6 hours per week	I do not do sport	Yes, it has worsened	Athlete	Sedentary	No	No	No	No	Yes	Yes	No	No	No
563	No	22	No	Yes	No	No	Yes	Yes	No	No	Once or several times a month	1 or 2 times a week	Once or several times a month	5 or 6 times a week	Yes	No	No	No	No	No	No	No	No	No	No	No	Yes	No	I do not do sport	I do not do sport	No, it has remained	Sedentary	Sedentary	No	No	Yes	No	No	Yes	No	No	No
565	No	48	No	No	No	Yes	No	No	No	Yes	Once or several times a month	3 or 4 times a week	1 or 2 times a week	Daily	No	No	Yes	No	No	No	No	No	No	No	No	Yes	No	No	4 to 6 hours per week	Less than 4 hours a week	Yes, it has worsened	Athlete	Athlete	No	No	No	No	Yes	Yes	No	No	No
566	Yes	54	No	No	No	No	Yes	No	No	Yes	Never	3 or 4 times a week	Daily	Daily	Yes	No	No	No	No	No	No	No	No	No	No	Yes	No	No	4 to 6 hours per week	Less than 4 hours a week	Yes, it has worsened	Athlete	Athlete	Yes	No	No	No	No	No	No	Yes	No
567	Yes	31	Yes	Yes	No	Yes	No	Yes	No	No	Once or several times a month	Once or several times a month	1 or 2 times a week	Once or several times a month	Yes	No	No	No	No	No	No	No	No	No	Yes	No	No	No	4 to 6 hours per week	I do not do sport	Yes, it has worsened	Athlete	Sedentary	No	No	No	No	Yes	No	No	Yes	No
568	No	21	Yes	Yes	Yes	No	No	No	Yes	No	Never	1 or 2 times a week	Once or several times a month	Daily	No	No	Yes	No	No	No	No	No	No	No	No	No	No	Yes	I do not do sport	4 to 6 hours per week	Yes, it has improved	Sedentary	Athlete	No	No	No	No	Yes	No	No	Yes	No
569	Yes	18	Yes	Yes	No	No	Yes	No	Yes	No	5 or 6 times a week	3 or 4 times a week	Never	5 or 6 times a week	Yes	No	No	No	No	No	No	No	No	No	No	No	No	Yes	Less than 4 hours a week	I do not do sport	Yes, it has worsened	Athlete	Sedentary	No	No	No	No	Yes	No	No	Yes	No
570	Yes	38	Yes	No	No	No	Yes	No	No	Yes	Never	Once or several times a month	Never	5 or 6 times a week	No	No	Yes	No	No	No	Yes	No	No	No	No	No	No	No	Less than 4 hours a week	I do not do sport	Yes, it has worsened	Athlete	Sedentary	No	No	No	No	Yes	Yes	No	No	No
571	No	39	No	No	No	No	Yes	No	No	Yes	Once or several times a month	1 or 2 times a week	1 or 2 times a week	Daily	Yes	No	No	No	No	No	No	No	No	No	Yes	No	No	No	Less than 4 hours a week	Less than 4 hours a week	No, it has remained	Athlete	Athlete	No	No	No	No	Yes	Yes	No	No	No
572	No	23	Yes	Yes	No	No	Yes	No	No	Yes	Never	Once or several times a month	Once or several times a month	Daily	Yes	No	No	No	No	No	No	No	No	No	No	Yes	No	No	Less than 4 hours a week	I do not do sport	Yes, it has worsened	Athlete	Sedentary	No	No	No	No	Yes	No	Yes	No	No
573	No	24	Yes	Yes	Yes	No	No	Yes	No	No	1 or 2 times a week	1 or 2 times a week	Never	5 or 6 times a week	No	No	Yes	No	No	Yes	No	No	No	No	No	No	No	No	I do not do sport	Less than 4 hours a week	Yes, it has improved	Sedentary	Athlete	No	No	Yes	No	No	Yes	No	No	No
577	Yes	19	Yes	Yes	No	No	Yes	No	No	Yes	Never	Once or several times a month	Never	5 or 6 times a week	Yes	No	No	No	No	No	No	No	No	No	Yes	No	No	No	6 to 8 hours per week	6 to 8 hours per week	No, it has remained	Athlete	Athlete	No	No	No	No	Yes	No	No	Yes	No
578	Yes	56	No	No	No	No	Yes	Yes	No	No	Never	Once or several times a month	Never	Daily	Yes	No	No	No	No	No	No	No	No	No	No	Yes	No	No	I do not do sport	I do not do sport	No, it has remained	Sedentary	Sedentary	No	No	No	No	Yes	No	No	Yes	No
579	No	52	No	No	Yes	No	No	No	Yes	No	Once or several times a month	Once or several times a month	Once or several times a month	5 or 6 times a week	Yes	No	No	No	No	No	No	No	No	No	No	No	No	Yes	4 to 6 hours per week	More than 8 hours a week	Yes, it has improved	Athlete	Athlete	No	No	No	No	Yes	Yes	No	No	No
581	No	74	No	No	Yes	No	No	Yes	No	No	Once or several times a month	Never	Daily	5 or 6 times a week	Yes	No	No	No	No	No	No	No	No	No	No	No	Yes	No	I do not do sport	Less than 4 hours a week	Yes, it has improved	Sedentary	Athlete	No	No	No	No	Yes	No	No	Yes	No
582	Yes	54	No	No	No	No	Yes	No	No	Yes	Never	Never	5 or 6 times a week	Daily	No	Yes	No	No	No	No	No	No	No	No	Yes	No	No	No	4 to 6 hours per week	4 to 6 hours per week	No, it has remained	Athlete	Athlete	No	No	No	No	Yes	No	No	Yes	No
583	Yes	29	No	Yes	No	No	Yes	No	No	Yes	Once or several times a month	Once or several times a month	1 or 2 times a week	5 or 6 times a week	Yes	No	No	No	No	No	No	No	No	No	Yes	No	No	No	4 to 6 hours per week	4 to 6 hours per week	No, it has remained	Athlete	Athlete	No	No	No	No	Yes	No	No	Yes	No
584	No	77	No	No	Yes	No	No	Yes	No	No	Never	Once or several times a month	1 or 2 times a week	Daily	No	Yes	No	No	No	No	No	No	No	No	No	No	Yes	No	I do not do sport	I do not do sport	No, it has remained	Sedentary	Sedentary	No	No	No	No	Yes	Yes	No	No	No
587	No	18	Yes	Yes	No	No	Yes	No	No	Yes	Never	Once or several times a month	Never	Daily	No	Yes	No	No	No	No	No	No	No	No	No	No	No	Yes	Less than 4 hours a week	Less than 4 hours a week	No, it has remained	Athlete	Athlete	No	No	No	No	Yes	Yes	No	No	No
588	No	23	No	Yes	No	No	Yes	No	No	Yes	Once or several times a month	3 or 4 times a week	Once or several times a month	Daily	Yes	No	No	No	No	No	No	No	No	No	No	No	No	Yes	Less than 4 hours a week	Less than 4 hours a week	No, it has remained	Athlete	Athlete	No	No	No	No	Yes	Yes	No	No	No
589	No	58	No	No	No	No	Yes	No	No	Yes	Never	Once or several times a month	Daily	Daily	No	No	Yes	No	No	No	No	No	No	No	No	Yes	No	No	4 to 6 hours per week	4 to 6 hours per week	No, it has remained	Athlete	Athlete	Yes	No	No	No	No	No	No	Yes	No
590	Yes	22	Yes	Yes	No	No	Yes	No	No	Yes	Once or several times a month	3 or 4 times a week	Once or several times a month	3 or 4 times a week	Yes	No	No	No	No	No	No	No	No	No	No	No	Yes	No	Less than 4 hours a week	Less than 4 hours a week	No, it has remained	Athlete	Athlete	No	No	No	No	Yes	Yes	No	No	No
591	Yes	50	No	No	No	No	Yes	No	No	Yes	Never	Once or several times a month	Once or several times a month	Daily	Yes	No	No	No	No	No	No	No	No	No	No	No	Yes	No	4 to 6 hours per week	I do not do sport	Yes, it has worsened	Athlete	Sedentary	No	No	No	No	Yes	No	No	Yes	No
593	Yes	25	No	Yes	No	Yes	No	No	Yes	No	Never	1 or 2 times a week	Once or several times a month	3 or 4 times a week	Yes	No	No	No	Yes	No	No	No	No	No	No	No	No	No	Less than 4 hours a week	I do not do sport	Yes, it has worsened	Athlete	Sedentary	No	No	No	No	Yes	Yes	No	No	No
594	Yes	54	No	No	No	No	Yes	Yes	No	No	Never	3 or 4 times a week	Daily	5 or 6 times a week	Yes	No	No	No	No	No	No	No	No	No	No	Yes	No	No	More than 8 hours a week	6 to 8 hours per week	Yes, it has worsened	Athlete	Athlete	No	No	No	No	Yes	Yes	No	No	No
595	No	41	No	No	No	No	Yes	No	No	Yes	Never	Once or several times a month	Daily	Daily	No	Yes	No	No	No	No	No	No	No	No	Yes	No	No	No	I do not do sport	I do not do sport	No, it has remained	Sedentary	Sedentary	No	No	No	No	Yes	Yes	No	No	No
596	No	66	No	No	No	No	Yes	No	No	Yes	Never	Once or several times a month	Once or several times a month	Daily	No	No	Yes	No	No	No	No	No	No	No	No	Yes	No	No	4 to 6 hours per week	4 to 6 hours per week	No, it has remained	Athlete	Athlete	No	No	No	No	Yes	No	No	Yes	No
597	No	59	No	Yes	Yes	No	No	No	Yes	No	Daily	5 or 6 times a week	Never	Once or several times a month	No	No	Yes	No	No	No	No	No	No	No	Yes	No	No	No	I do not do sport	I do not do sport	No, it has remained	Sedentary	Sedentary	No	No	No	No	Yes	No	No	Yes	No
599	Yes	39	No	Yes	No	No	Yes	No	No	Yes	Once or several times a month	1 or 2 times a week	Once or several times a month	Daily	Yes	No	No	No	No	No	Yes	No	No	No	No	No	No	No	4 to 6 hours per week	4 to 6 hours per week	No, it has remained	Athlete	Athlete	No	No	No	No	Yes	Yes	No	No	No
600	Yes	35	No	No	No	No	Yes	Yes	No	No	Never	1 or 2 times a week	Never	Daily	No	Yes	No	No	Yes	No	No	No	No	No	No	No	No	No	4 to 6 hours per week	I do not do sport	Yes, it has worsened	Athlete	Sedentary	No	No	No	No	Yes	Yes	No	No	No
601	Yes	63	No	No	No	No	Yes	No	No	Yes	Never	Once or several times a month	Never	Daily	No	Yes	No	No	Yes	No	No	No	No	No	No	No	No	No	6 to 8 hours per week	6 to 8 hours per week	No, it has remained	Athlete	Athlete	No	No	No	No	Yes	No	No	Yes	No
603	Yes	23	Yes	Yes	No	No	Yes	No	Yes	No	Once or several times a month	Daily	Never	1 or 2 times a week	No	Yes	No	No	No	No	No	No	No	No	No	No	No	Yes	I do not do sport	I do not do sport	No, it has remained	Sedentary	Sedentary	No	No	No	No	Yes	Yes	No	No	No
604	No	23	Yes	Yes	Yes	No	No	No	Yes	No	Once or several times a month	Never	1 or 2 times a week	5 or 6 times a week	No	No	Yes	No	No	No	No	No	No	No	No	Yes	No	No	More than 8 hours a week	More than 8 hours a week	No, it has remained	Athlete	Athlete	No	No	No	No	Yes	No	No	Yes	No
605	Yes	45	No	Yes	No	Yes	No	No	Yes	No	Never	1 or 2 times a week	Never	Daily	No	No	Yes	No	No	No	No	No	No	No	No	No	Yes	No	4 to 6 hours per week	6 to 8 hours per week	Yes, it has improved	Athlete	Athlete	No	No	No	No	Yes	Yes	No	No	No
606	No	77	No	No	No	No	Yes	No	No	Yes	Never	1 or 2 times a week	Once or several times a month	Daily	No	Yes	No	No	No	No	No	Yes	No	No	No	No	No	No	Less than 4 hours a week	4 to 6 hours per week	Yes, it has improved	Athlete	Athlete	No	No	No	No	Yes	No	No	Yes	No
607	Yes	18	Yes	Yes	No	No	Yes	No	Yes	No	1 or 2 times a week	3 or 4 times a week	Once or several times a month	Daily	Yes	No	No	No	No	No	No	No	No	No	No	No	Yes	No	6 to 8 hours per week	6 to 8 hours per week	No, it has remained	Athlete	Athlete	No	No	No	No	Yes	Yes	No	No	No
609	Yes	23	Yes	Yes	No	Yes	No	Yes	No	No	3 or 4 times a week	Daily	1 or 2 times a week	Daily	Yes	No	No	No	No	No	No	No	No	No	No	No	No	Yes	6 to 8 hours per week	I do not do sport	Yes, it has worsened	Athlete	Sedentary	No	No	No	No	Yes	Yes	No	No	No
610	No	41	No	No	No	No	Yes	No	Yes	No	Never	Once or several times a month	Never	Daily	No	Yes	No	No	No	No	No	No	No	No	No	No	Yes	No	4 to 6 hours per week	Less than 4 hours a week	Yes, it has worsened	Athlete	Athlete	No	No	No	No	Yes	No	No	Yes	No
612	Yes	24	No	Yes	No	No	Yes	No	No	Yes	1 or 2 times a week	1 or 2 times a week	Once or several times a month	Daily	Yes	No	No	No	Yes	No	No	No	No	No	No	No	No	No	I do not do sport	I do not do sport	No, it has remained	Sedentary	Sedentary	No	No	No	No	Yes	Yes	No	No	No
615	No	21	Yes	Yes	Yes	No	No	No	Yes	No	Once or several times a month	1 or 2 times a week	Never	5 or 6 times a week	Yes	No	No	No	No	No	No	No	No	No	Yes	No	No	No	I do not do sport	I do not do sport	No, it has remained	Sedentary	Sedentary	No	No	No	No	Yes	Yes	No	No	No
616	No	52	No	No	No	No	Yes	No	Yes	No	Once or several times a month	Once or several times a month	5 or 6 times a week	3 or 4 times a week	No	No	Yes	No	No	No	No	No	No	No	No	No	Yes	No	4 to 6 hours per week	Less than 4 hours a week	Yes, it has worsened	Athlete	Athlete	No	No	No	No	Yes	No	No	Yes	No
617	Yes	24	Yes	Yes	No	Yes	No	Yes	No	No	Once or several times a month	1 or 2 times a week	Once or several times a month	5 or 6 times a week	No	No	Yes	No	No	No	No	No	No	No	No	No	No	Yes	6 to 8 hours per week	I do not do sport	Yes, it has worsened	Athlete	Sedentary	No	No	No	No	Yes	Yes	No	No	No
618	No	42	No	No	No	No	Yes	No	No	Yes	Once or several times a month	Daily	Never	3 or 4 times a week	Yes	No	No	No	No	No	No	No	Yes	No	No	No	No	No	4 to 6 hours per week	4 to 6 hours per week	No, it has remained	Athlete	Athlete	No	No	No	No	Yes	Yes	No	No	No
619	No	27	No	Yes	No	No	Yes	No	No	Yes	1 or 2 times a week	Daily	1 or 2 times a week	Daily	Yes	No	No	No	No	No	No	No	No	No	No	No	No	Yes	I do not do sport	I do not do sport	No, it has remained	Sedentary	Sedentary	No	No	No	No	Yes	No	No	Yes	No
620	Yes	50	No	No	No	No	Yes	No	No	Yes	Never	1 or 2 times a week	Once or several times a month	1 or 2 times a week	No	No	Yes	No	No	No	No	No	No	No	No	Yes	No	No	I do not do sport	I do not do sport	No, it has remained	Sedentary	Sedentary	No	No	No	No	Yes	Yes	No	No	No
621	Yes	54	No	No	No	No	Yes	Yes	No	No	Never	Once or several times a month	1 or 2 times a week	Daily	Yes	No	No	No	No	No	No	No	Yes	No	No	No	No	No	Less than 4 hours a week	I do not do sport	Yes, it has worsened	Athlete	Sedentary	No	No	No	No	Yes	Yes	No	No	No
622	No	63	No	No	No	No	Yes	No	Yes	No	Never	Once or several times a month	5 or 6 times a week	Daily	Yes	No	No	No	No	No	No	No	No	No	No	No	Yes	No	More than 8 hours a week	More than 8 hours a week	No, it has remained	Athlete	Athlete	No	No	No	No	Yes	No	No	Yes	No
623	Yes	24	No	Yes	Yes	No	No	No	Yes	No	Once or several times a month	Once or several times a month	Once or several times a month	3 or 4 times a week	Yes	No	No	No	No	No	Yes	No	No	No	No	No	No	No	Less than 4 hours a week	4 to 6 hours per week	Yes, it has improved	Athlete	Athlete	No	No	No	No	Yes	Yes	No	No	No
624	Yes	46	No	No	Yes	No	No	No	Yes	No	1 or 2 times a week	3 or 4 times a week	Once or several times a month	Daily	Yes	No	No	No	No	No	No	No	No	No	No	Yes	No	No	Less than 4 hours a week	Less than 4 hours a week	No, it has remained	Athlete	Athlete	No	Yes	No	No	No	Yes	No	No	No
625	No	24	No	Yes	Yes	No	No	No	Yes	No	Never	3 or 4 times a week	Never	Daily	No	No	Yes	No	No	No	No	No	No	No	No	Yes	No	No	4 to 6 hours per week	4 to 6 hours per week	No, it has remained	Athlete	Athlete	No	No	No	No	Yes	No	No	Yes	No
626	No	38	No	Yes	No	No	Yes	No	No	Yes	Once or several times a month	Once or several times a month	1 or 2 times a week	5 or 6 times a week	Yes	No	No	No	No	No	No	No	No	No	No	Yes	No	No	4 to 6 hours per week	Less than 4 hours a week	Yes, it has worsened	Athlete	Athlete	No	No	No	No	Yes	No	No	Yes	No
627	Yes	22	Yes	Yes	Yes	No	No	Yes	No	No	Once or several times a month	Daily	Never	Daily	No	Yes	No	No	No	No	No	No	No	No	No	Yes	No	No	I do not do sport	Less than 4 hours a week	Yes, it has improved	Sedentary	Athlete	No	No	No	No	Yes	Yes	No	No	No
628	No	25	No	Yes	No	No	Yes	Yes	No	No	Once or several times a month	1 or 2 times a week	3 or 4 times a week	5 or 6 times a week	Yes	No	No	No	No	No	No	No	Yes	No	No	No	No	No	Less than 4 hours a week	4 to 6 hours per week	Yes, it has improved	Athlete	Athlete	No	No	No	No	Yes	Yes	No	No	No
629	No	24	No	Yes	No	No	Yes	No	No	Yes	Never	1 or 2 times a week	Once or several times a month	1 or 2 times a week	No	No	Yes	No	No	No	No	No	Yes	No	No	No	No	No	4 to 6 hours per week	4 to 6 hours per week	No, it has remained	Athlete	Athlete	No	No	No	No	Yes	No	No	Yes	No
630	No	24	No	Yes	No	No	Yes	No	No	Yes	Never	1 or 2 times a week	1 or 2 times a week	Daily	Yes	No	No	No	No	No	No	No	No	Yes	No	No	No	No	More than 8 hours a week	6 to 8 hours per week	Yes, it has worsened	Athlete	Athlete	No	No	No	No	Yes	Yes	No	No	No
631	Yes	38	No	No	No	No	Yes	No	No	Yes	Once or several times a month	Once or several times a month	1 or 2 times a week	Daily	Yes	No	No	No	No	No	No	No	No	No	Yes	No	No	No	4 to 6 hours per week	Less than 4 hours a week	Yes, it has worsened	Athlete	Athlete	No	No	No	No	Yes	Yes	No	No	No
